# The Mechanism of Vascular Endothelial Dysfunction Induced by Ferroptosis Mediated by NARFL Knockout

Hui Hu<sup>1,2</sup>, Jing Luo<sup>1</sup>, Li Yu<sup>1</sup>, Daoxi Qi<sup>1</sup>, Boyu Li<sup>1</sup>, Yating Cheng<sup>1</sup>, Chen Wang<sup>1</sup>,  
Xiaokang Zhang<sup>1</sup>, Qiyong Lou<sup>3</sup>, Gang Zhai<sup>3</sup>, Yonglin Ruan<sup>3</sup>, Jianfei Huang<sup>3</sup>,  
Shengchi Shi<sup>3</sup>, Zhan Yin<sup>3\*</sup>, Fang Zheng<sup>1\*</sup>

1. Center for Gene Diagnosis, Zhongnan Hospital of Wuhan University, Wuhan, Hubei, 430071, China
  2. Department of Laboratory Medicine, Shanghai East Hospital, Tongji University School of Medicine, Shanghai, 200123, China
  3. State Key Laboratory of Freshwater Ecology and Biotechnology, Institute of Hydrobiology, Chinese Academy of Sciences, Wuhan, Hubei, 430072, China
- \*Corresponding author  
E-mail addresses: zyin@ihb.ac.cn (Z. Yin), zhengfang@whu.edu.cn (F. Zheng)

**BACKGROUND:** Nuclear prelamin A recognition factor-like (NARFL) plays a crucial role in cytosolic iron-sulfur protein assembly (CIA) and protects cells against oxidative stress. In our previous study, we identified a novel homozygous mutation in NARFL that led to decreased expression in a consanguineous family with diffuse pulmonary arteriovenous malformations (DPAVMs) secondary to pulmonary hypertension. Additionally, we observed that *narfl* deletion in zebrafish resulted in larvae lethality, subintestinal vessel malformation, and increased oxidative stress. In this study, we aimed to further investigate the function of NARFL and elucidate the pathological manifestations of NARFL deficiency in zebrafish models, cellular models, mouse models, and clinical samples, focusing on the underlying molecular mechanisms.

**METHODS:** We observed the behavioral and phenotypic abnormalities in zebrafish caused by *narfl* deletion and investigated the mechanism behind vascular morphological abnormalities. Furthermore, we constructed *NARFL* gene knockout stable cell lines in human pulmonary microvascular endothelial cells (HPMEC) to examine the morphological and functional changes in endothelial cells caused by NARFL deletion. We studied the effects of NARFL deletion on ferroptosis and its potential rescue using a ferroptosis inhibitor. To investigate the function of the human NARFL homolog *Ciao3* gene in vascular development, we created a mouse model with a knockout of the *Ciao3* gene. Finally, we compared the distribution of tagSNPs of NARFL using the SNaPshot method between cases and controls to confirm the role of the *Ciao3* gene in endothelial dysfunction.

**RESULTS:** *Narfl* deletion in zebrafish resulted in larvae lethality, vascular malformation with abnormal blood flow, abnormal blood-brain barrier (BBB) structure, and brain neuron lesions.

Eluorescence probe detection showed increased iron, enhanced oxidative stress, lipid peroxidation  
**NOTE: This preprint reports new research that has not been certified by peer review and should not be used to guide clinical practice.**

and decreased mitochondrial respiration in response to *narfl* deficiency, which could be partially alleviated by the use of the ferroptosis inhibitor Ferrostatin-1. We observed downregulation of the iron-sulfur protein *cyp2p8* expression in blood vessels of *narfl*-deficient zebrafish through qRT-PCR and WISH experiments. In HPMEC cells, NARFL deficiency resulted in decreased proliferation, abnormal mitochondrial morphology, increased levels of iron and oxidative stress, and decreased mitochondrial respiration. Functional experiments on endothelial cells revealed decreased tube formation ability and enhanced permeability in response to NARFL deficiency. WB experiments showed downregulation of GPX4, SLC7A11, and Ferritin, while TFR1 and IRP1 were upregulated. Downregulation of NARFL also affected the expression of the iron-sulfur protein CYP2J2. Co-IP results indicated that NARFL deletion led to incompatibility among the CIA system-associated proteins. In mice, *Ciao3* deletion in the embryonic stage resulted in embryonic death, vascular dysplasia, impaired differentiation of endothelial progenitor cells, and abnormalities in the expression of ferroptosis-related proteins. Reduction of *Ciao3* impaired vascular function and decreased ring formation ability in adult heterozygous mice. *NARFL* polymorphisms rs11248948, rs2071952, and rs611289 were identified as susceptible sites for epilepsy, while rs11792680 was associated with susceptibility to pulmonary hypertension, epilepsy, and neurodegenerative diseases.

**CONCLUSION:** NARFL knockout disrupts its interaction with CIA system-related proteins, leading to decreased aconitase activity, increased IRP1 activity, endothelial cell ferroptosis pathway abnormalities, enhanced ferroptosis and oxidative stress, and ultimately vascular endothelial dysfunction. This dysfunction is responsible for the death of embryos in *narfl*<sup>-/-</sup> zebrafish and *Ciao3*<sup>-/-</sup> mice, as well as the susceptibility to pulmonary hypertension, epilepsy, and neurodegenerative diseases.

**Keywords:** NARFL; Ferroptosis; Oxidative damage; Vascular endothelial dysfunction; Gene polymorphism

### What Is New?

1. Elucidation of the mechanism behind NARFL knockout-induced death through dynamic visualization experiments *in vivo* and mechanism and function experiments *in vitro*: The study explored the function of NARFL, as it is known as a "knockout lethal" protein. Both *in vivo* and *in vitro* experiments have confirmed that NARFL acts as the "transmitter" of cytoplasmic iron-sulfur clusters. Its absence prevents interaction with associated proteins of the CIA system, leading to reduced cisaconitase activity, enhanced IRP1 activity, ferroptosis of endothelial cells, and increased oxidative stress, eventually resulting in cell death.
2. Providing new research ideas for the study of cytoplasmic iron-sulfur proteins: Most current

studies focus on the function of mitochondrial iron-sulfur proteins and their relationship with iron death. However, research on extramitochondrial iron-sulfur proteins is relatively limited. This study provides data support and research ideas for understanding the function of extramitochondrial iron-sulfur proteins by exploring the pathological mechanism of NARFL and the mediation of iron-sulfur protein maturation.

### **What Are the Clinical Implications?**

From rare diseases to common diseases: Through the investigation of the lethal mechanism of NARFL knockout and the study of *NARFL* gene polymorphisms associated with vascular endothelial dysfunction diseases, we propose the hypothesis that NARFL may be a susceptibility gene for these diseases. This study provides data support for the hypothesis and contributes to our understanding of the role of NARFL in vascular endothelial dysfunction diseases.

### **METHODS**

The materials and methods that support the study findings are available from the corresponding author on reasonable request.

### **Human and Animal Subjects and Ethical Considerations**

In the case of patients with pulmonary hypertension involving pulmonary veins or capillaries, inclusion criteria required an average pulmonary arterial pressure (mPAP) of  $\geq 25$  mmHg measured by right cardiac catheterization or estimated from echocardiography using parameters such as pulmonary valve regurgitation beam spectrum, right atrial regurgitation beam spectrum, and tricuspid regurgitation flow. Exclusion criteria included pulmonary hypertension caused by congenital heart disease, left ventricular disease, lung disease, and/or hypoxia. For patients with cerebral small vascular disease, inclusion criteria encompassed various cerebrovascular diseases such as epilepsy, Alzheimer's disease, lacunar cerebral infarction, Binswanger encephalopathy, autosomal dominant cerebral arteriopathy, and amyloidosis cerebrovascular disease with subcortical cerebral infarction and leukoencephalopathy. MRI findings needed to meet the imaging diagnostic criteria of cerebrovascular disease, including lacunar cerebral infarction, white matter changes, and cerebral microhemorrhage. Exclusion criteria encompassed imaging changes caused by carbon monoxide poisoning, severe sleep apnea syndrome, infection-related brain changes, and trauma-induced brain changes. For patients with systemic lupus erythematosus due to endothelial cell injury, clinical symptoms needed to meet the diagnostic criteria revised by the American Rheumatology Society in 1997. Immunological abnormalities included positivity for anti-ds-DNA antibodies, anti-Sm antibodies, or anti-phospholipid antibodies (which encompassed

indicators such as anticardiolipin antibody, positive lupus anticoagulant, or false-positive syphilis serum test results persisting for at least 6 months). Additionally, elevated levels of markers related to systemic lupus erythematosus endothelial cell injury, such as vWF, MDA, GSH, and SOD, were observed. Patient information, including age, sex, smoking and alcohol consumption status, body mass index (BMI), echocardiography results, and routine biochemical indicators, was collected by consulting enrollment and admission records, electronic medical records, and laboratory examination information. All data were collected using a blind method and collected, organized, entered, and verified by different personnel. This study strictly adhered to the principles outlined in the Helsinki Declaration and received approval from the Ethics Committee of Zhongnan Hospital, Wuhan University.

### Statistical Analysis

Mean $\pm$ SEM or mean $\pm$ SD was used to represent the data. For cell culture data, three independent experiments were performed in triplicate. Animal numbers were determined based on the calculation of a  $\geq 20\%$  difference between the means of experimental and control groups with a statistical power of 80% and a standard deviation (SD) of 10%. The normality of data was confirmed using Shapiro-Wilk testing. For comparisons between two groups with normally distributed data, a two-tailed Student's t-test was performed. When comparing multiple groups, either one-way or two-way ANOVA was used, as appropriate. A p-value of less than 0.05 was considered statistically significant.

### Background

In a consanguineous family with diffuse pulmonary arteriovenous malformations (DPAVMs) leading to pulmonary arterial hypertension, the research group identified a novel homozygous mutation (pSer161Ile) in the NARFL gene<sup>1</sup> (**Figure 1A-E in the online-only Data Supplement**). This mutation was associated with a decrease in mRNA stability and expression levels of NARFL, and narfl<sup>-/-</sup> zebrafish embryos exhibited lethal vascular malformation, indicating a potential involvement of NARFL in the development of pulmonary arteriovenous malformation.

The CIA system, which operates in the eukaryotic cytoplasm, comprises various proteins that work together to perform ISC-related functions<sup>2,3,7,8</sup>. Iron-sulfur proteins containing iron-sulfur clusters (ISC) serve as prosthetic groups for electron transport proteins and active groups for enzymes, participating in essential physiological processes such as energy metabolism, amino acid and iron metabolism, DNA replication and repair, and gene expression regulation<sup>4</sup>. While the process of ISC core biogenesis has been extensively studied, particularly in mitochondrial iron-sulfur proteins, research on the function of iron-sulfur proteins outside the mitochondria

remains limited<sup>4-6</sup>.

The CIA system, which operates in the eukaryotic cytoplasm, comprises various proteins that work together to perform ISC-related functions. These include nucleotide binding protein 1 (NUBP1) and nucleotide binding protein 2 (NUBP2) as scaffold proteins that bind and accept ISC, NARFL as an intermediate carrier protein for transmitting ISC, and a CIA targeting complex (CTC) consisting of CIA Component 1 (CIAO1), Methyl methanesulfonate sensitivity 19 (MMS19), and MIP18 (MMS19-interacting protein of 18kDa or CIAO2/FAM96B), which inserts ISC into specific apoproteins<sup>9, 10</sup>. NARFL, as an essential component of CIA, influences the synthesis and maturation of cytoplasmic iron-sulfur proteins. Notably, cytoplasmic aconitase (ACO1), a well-studied cytoplasmic iron-sulfur protein, plays a critical role in catalyzing isocitric acid. ACO1 functions as ACO1 when it receives ISC<sup>11,12</sup>. Upon ISC loss, it transforms into iron regulatory protein 1 (IRP1), acting as an apoprotein of ACO1<sup>13,14</sup>. Consequently, the knockdown of NARFL may lead to decreased ACO1 activity, increased IRP1 protein activity, and disruptions in iron metabolism, potentially contributing to vascular dysfunction.

## RESULTS

### **Narfl Deficiency Leads to Abnormal Behavior and Abnormal Blood Vessels and Neurons in Zebrafish**

The swimming trajectories of different zebrafish genotypes were analyzed under normal illumination for a duration of 60 minutes (**Figure 1A**). The results revealed significant differences in total swimming distance, average swimming speed, and outbreak duration between *narfl*<sup>-/-</sup> zebrafish and wild-type zebrafish (**Figure 1B**). Notably, *narfl*<sup>-/-</sup> zebrafish exhibited increased activity, often displaying spontaneous and irregular movements reminiscent of epileptic seizures<sup>15, 16</sup>. Seeking to elucidate the underlying cause of this phenotype, toluidine blue staining of 7-day-old zebrafish revealed dissolved Nissl corpuscles, flattened morphology, and shifted nuclei in *narfl*<sup>-/-</sup> zebrafish compared to wild-type zebrafish (**Figure 1C**), indicating pathological changes in neurons. Examination of the blood-brain barrier (BBB) ultrastructure using transmission electron microscopy showed that endothelial cells of *narfl*<sup>-/-</sup> zebrafish had evident shrinkage, expansion, and basement membrane breaks, in contrast to the plump and intact structure observed in wild-type zebrafish (**Figure 1D**). TUNEL staining of the brains of 9-day-old zebrafish did not reveal significant differences (**Figure 2C in the online-only Data Supplement**). Furthermore, by establishing hybridizations between *Tg (flk: eGFP)* zebrafish models and *narfl* (+/+) or *narfl* (-/-), confocal microscopy observations of cerebral vessels demonstrated defects in *narfl* (-/-) zebrafish, characterized by decreased vessel quantity and disorganized arrangement (**Figure 1E and Figure**

**2B in the online-only Data Supplement**). Previous studies have shown that *narfl* deletion resulted in early zebrafish embryo death<sup>17</sup>. Notably, the growth of *narfl* *-/-* zebrafish embryos displayed various deformities and irregularities (**Figure 2A in the online-only Data Supplement**). Further analysis using fluorescence confocal microscopy and quantitative assessment of zebrafish vascular segments revealed disordered or absent connective cells in *narfl* *-/-* zebrafish dorsal longitudinal anastomosis vessels, along with notable structural disorganization and distortion of the dorsal aorta and posterior cardinal vein (PCV) (**Figure 1F and G and Figure 2D in the online-only Data Supplement**). Detection of  $\gamma$ -H2AX indicated substantial DNA damage in the dorsal aorta and PCV (**Figure 2E and F in the online-only Data Supplement**).

### **Narfl Deficiency Induces Zebrafish Dysangiogenesis by Upregulating Iron Levels and ROS Production and Lipid Peroxidation**

To investigate whether the abnormal vascular morphology in *narfl* *-/-* zebrafish is a result of endothelial cell dysfunction and hemodynamic abnormalities, we utilized the Micro Zebra Lab system from the 3 dpf of zebrafish development (**Figure 2A**). Considering the high mortality rate prior to the 13 dpf, we monitored the zebrafish until the end of the 13 dpf day. Subsequently, we calculated the mean blood flow velocity and mean linear velocity from 3 dpf to 13 dpf. The statistical analysis revealed that the mean blood flow velocity and linear velocity in *narfl* *-/-* zebrafish showed no significant differences compared to wild-type zebrafish at 3-5 dpf, but were significantly higher at 6 dpf, significantly lower at 7-11 dpf, and significantly lower at 11-13 dpf (**Figure 2B, C**).

To assess the levels of endothelin-1 (ET-1) and nitric oxide (NO), we measured their concentrations at 4 dpf, 6 dpf, 8 dpf, 10 dpf, and 12 dpf. The results revealed that the levels of ET-1 in *narfl* *-/-* zebrafish at 6 dpf, 8 dpf, and 10 dpf were significantly higher than those in wild-type zebrafish. Conversely, the levels of NO at 6 dpf, 8 dpf, 10 dpf, and 12 dpf were significantly lower in *narfl* *-/-* zebrafish compared to wild-type zebrafish (**Figure 2D, E**).

To assess reactive oxygen species (ROS) levels, we utilized the DCFH-DA probe in zebrafish (**Figure 2F**). The fluorescence intensity in *narfl* *-/-* zebrafish was significantly higher compared to wild-type zebrafish, indicating an elevated oxidative stress due to *narfl* deletion. We also employed the DPPP probe (**Figure 2G**) and the BODIPY 493/503 probe (**Figure 2H**) to measure lipid peroxidation in zebrafish. The results demonstrated that the fluorescence intensity was significantly higher in *narfl* *-/-* zebrafish compared to wild-type zebrafish, indicating an increase in lipid peroxidation due to *narfl* deletion.

However, the fluorescence intensity of apoptosis, as detected by AO staining, did not

significantly increase in *narfl*<sup>-/-</sup> zebrafish compared to wild-type zebrafish (**Figure 3A in the online-only Data Supplement**), suggesting that *narfl* deletion did not significantly affect apoptosis. Using a colorimetric method, we measured the Fe<sup>2+</sup> and Fe<sup>3+</sup> contents in *narfl*<sup>-/-</sup> zebrafish and found that they were significantly higher compared to wild-type zebrafish (**Figure 2I**). Prussian blue staining of the zebrafish brain revealed a significant increase in hemosiderin content in *narfl*<sup>-/-</sup> zebrafish compared to wild-type zebrafish (**Figure 3B in the online-only Data Supplement**), indicating an elevation of iron levels in *narfl* deficiency.

In line with these findings, cytoplasmic cis-aconitase activity significantly increased in *narfl*<sup>-/-</sup> zebrafish (**Figure 2J**), while glutathione and glutamine (GSH-GL) content significantly decreased (**Figure 2K**).

### **Narfl Deficiency Impairs Mitochondrial Respiratory Function and Downregulates Cyp2p8 Expression in Zebrafish**

To assess the impact of *narfl* deletion on mitochondrial respiratory function in zebrafish, we used the Seahorse XFe24 cell metabolic respiratory dynamic analyzer to measure the changes in oxygen consumption rate (OCR) upon treatment with oligomycin, FCCP (a mitochondrial oxidative phosphorylation uncoupler), rotenone, and sodium azide. OCR reflects mitochondrial electron transfer and provides insights into respiratory function. We examined mitochondrial respiratory function in 11 wild-type and 8 *narfl*<sup>-/-</sup> zebrafish. Integration of the results revealed a significant impairment in mitochondrial respiratory function in *narfl*<sup>-/-</sup> zebrafish compared to wild-type zebrafish, indicating that *narfl* deletion leads to reduced mitochondrial respiratory function (**Figure 2L**).

In transcriptome sequencing analysis of *narfl*<sup>+/+</sup> and *narfl*<sup>-/-</sup> zebrafish, we found significant differences in a large number of genes related to iron metabolism. Among them, cytochrome P450 (CYP450) family genes, including *cyp2p8*, *cyp3a65*, *cyp3c3*, *cyp2x7*, *cyp2k8*, *cyp24a1*, *cyp46a*, *cyp51*, *cyp2v1*, *cyp8b2*, *cyp2ad3*, *cyp2aa7*, and *cyp2n13* exhibited significant downregulation in *narfl*<sup>-/-</sup> zebrafish (**Figure 3E in the online-only Data Supplement**). Notably, *cyp2p8* displayed the most significant downregulation and was chosen as the target downstream gene (**Figure 2M**). In situ hybridization with a *cyp2p8* probe on 5-dpf embryos revealed expression of *cyp2p8* in zebrafish blood vessels, with slightly enhanced signal in *narfl*<sup>-/-</sup> zebrafish treated with Ophiopogonin D, a specific activator of *cyp2p8* (**Figure 2N**).

In humans, *cyp2p8* is known as *CYP2J2*. To examine whether NARFL deletion also leads to decreased expression of corresponding iron-sulfur proteins in humans, we performed

immunohistochemical staining on lung tissues from the proband with NARFL downregulation and control samples (**Figure 2O**). The results showed that CYP2J2 expression, mainly in the cytoplasm, was decreased in the proband with downregulated NARFL expression, consistent with the findings in zebrafish. Thus, these results suggest that *narfl* deletion leads to downregulation of cytoplasmic iron-sulfur protein CYP2J2 expression in zebrafish, providing insights into the molecular mechanisms underlying *Narfl* deficiency-induced mitochondrial dysfunction and dysregulation of iron-sulfur metabolism.

### **Endothelial Cell Knockdown of NARFL Promotes Ferroptosis and Ferrostain-1 can Alleviate Oxidative Stress Injury Caused by NARFL deficiencies**

Immunofluorescence staining of lung tissues from a patient with pulmonary hypertension secondary to diffuse pulmonary arteriovenous malformation revealed a significant decrease in NARFL expression in the blood vessels compared to normal lung tissues. In addition, the expression of CD31, an endothelial cell marker, was decreased, while the expression of  $\alpha$ -smooth muscle actin ( $\alpha$ -SMA) was increased (**Figure 1F in the online-only Data Supplement**). To further investigate the mechanism, a NARFL knockout model was established using Human Pulmonary Microvascular Endothelial Cells (HPMECs) (**Figure 4A-D in the online-only Data Supplement**). The *NARFL*<sup>-/-</sup> HPMECs exhibited slow growth, increased cell death, and distinct morphological changes compared to wild-type cells. The morphology of NARFL mutant cells resembled that of cells undergoing ferroptosis. Furthermore, the proliferation ability of NARFL knockout cells was significantly decreased compared to wild-type cells (**Figure 4E in the online-only Data Supplement**).

Transmission electron microscopy analysis revealed altered mitochondrial morphology in NARFL mutant cells, characterized by smaller mitochondria, increased mitochondrial membrane density, and reduced cristae, resembling the morphology observed in ferroptosis (**Figure 3G and Figure 4F in the online-only Data Supplement**). To explore whether ferroptosis inhibitors can alleviate oxidative stress injury induced by NARFL deletion, Ferrostain-1 (a ferroptosis inhibitor) and  $\alpha$ -Vitamin E (an oxidative stress inhibitor) were employed (**Figure 3C-D in the online-only Data Supplement**). The results demonstrated that 8  $\mu$ M of Ferrostain-1 had the most pronounced effect on *narfl*<sup>-/-</sup> zebrafish, extending their survival time from 13 to 21 days (**Figure 3H**) and reducing lipid peroxidation levels caused by *narfl* deletion (**Figure 3I**). FerroOrange fluorescence results showed a significant increase in cellular ferrous ion content after NARFL deletion, which was significantly reduced upon addition of Ferrostain-1 (**Figure 3B-C**). NARFL deletion resulted in decreased cytoplasmic cis-aconitase activity and intracellular glutathione and glutamine levels



in endothelial cells, which were partially restored by Ferrostatin-1 (**Figure 3D-F**).

Furthermore, Cell Rox kit was employed to assess the oxidative stress levels of endothelial cells. The findings demonstrated that NARFL deletion led to increased oxidative stress levels, and Ferrostatin-1 partially alleviated the oxidative stress induced by NARFL gene deficiency (**Figure 4A-B**).

### **NARFL Deletion Induces Endothelial Cell Dysfunction *in vitro***

Immunofluorescence analysis demonstrated that the deletion of *NARFL* gene resulted in down-regulation of CD31, a marker of endothelial cells, and up-regulation of  $\alpha$ -SMA, a marker of fibroblasts<sup>20</sup>, consistent with the immunohistochemical features observed in the lung tissue of the proband (**Figure 4C**). We further investigated the impact of NARFL deletion on mitochondrial respiratory function and glycolysis rate using wild-type HPMECs, HPMECs with NARFL deletion, and HPMECs transfected with mutant *NARFL* (*c.482 G > T*) plasmid. The results revealed that mitochondrial respiratory function decreased in HPMECs with mutant *NARFL* (*c.482 G > T*) (**Figure 4D-F**), though the difference was minimal compared to wild-type HPMECs. However, NARFL deletion significantly reduced mitochondrial respiratory function without affecting glycolysis rate (**Figure 5A-C in the online-only Data Supplement**). Moreover, NARFL deletion led to decreased expression of CD31 in HPMECs, and *narfl* deletion in zebrafish resulted in decreased expression of *cyp2p8* (CYP2JP in humans).

To assess the impact of *NARFL* gene deletion on endothelial cell function, we compared tubule formation ability in wild-type HPMECs, NARFL-deleted HPMECs, NARFL-deleted HPMECs treated with Ferrostatin-1, and NARFL-deleted HPMECs transfected with *CYP2J2* plasmid (**Figure 5A**). The results demonstrated that NARFL deletion impaired tubule formation, while treatment with Ferrostatin-1 and overexpression of *CYP2J2* partly restored this function (**Figure 5B**). Furthermore, the Evans Blue cell osmotic assay revealed that NARFL deletion led to impaired cell osmotic ability, which could be partially restored by Ferrostatin-1, an ferroptosis inhibitor, and overexpression of *CYP2J2* plasmid (**Figure 5D-F in the online-only Data Supplement**).

### **NARFL Deletion Results in Abnormal Ferroptosis Pathway and Disruption of CIA System-Related Protein Interaction in Endothelial Cells**

Thus far, our findings suggest that NARFL deficiency leads to increased intracellular iron levels and oxidative stress, ultimately triggering ferroptosis. However, the specific underlying mechanism remains unclear. Intracellular iron metabolism begins with the binding of iron to

transferrin in circulation, followed by endocytosis into cells through binding with the transferrin receptor 1 (TFR1) on the cell membrane, forming an unstable iron pool. Some of the iron is stored in the cytoplasm in the form of ferritin. In cells undergoing ferroptosis, the levels of iron and transferrin increase, while the amount of membrane iron transporter decreases<sup>21</sup>. Glutathione peroxidase 4 (GPX4) serves as a key regulator of ferroptosis<sup>22</sup>, converting glutathione (GSH) into oxidized glutathione to prevent cytotoxic lipid peroxidation and protect cells from ferroptosis. The GPX4 pathway is regulated by the cystine transporter system Xc<sup>-</sup> (composed of catalytic subunit SLC7A11 and chaperone subunit SLC3A2). Cystine uptake mediated by SLC7A11 plays a crucial role in inhibiting oxidative reactions and maintaining cell survival under oxidative stress. Using Western blotting, we observed that NARFL deficiency led to down-regulated expression of GPX4, SLC7A11, and Ferritin, while TFR1 and IRP1 were up-regulated. In the zebrafish model study, NARFL deletion resulted in decreased expression of the iron-sulfur protein CYP2J2. In the HPMEC cell model, we found that NARFL deletion significantly reduced CYP2J2 expression, and transfection and overexpression of *NARFL* plasmid in NARFL deletion HPMECs partially restored the above changes. These results indicate that NARFL down-regulation not only up-regulates IRP1, which subsequently up-regulates TFR1 and down-regulates Ferritin, but also inhibits SLC7A11 and GPX4, activating the ferroptosis pathway (**Figure 5C, E**). NARFL is considered as the initiator of the cytoplasmic iron-sulfur protein assembly system known as the CIA system, which further transports mitochondrial iron-sulfur protein clusters. The CIA targeting complex (CTC), composed of CIAO1, MIP18, and MMS19, interacts with NARFL and facilitates the embedding of iron-sulfur clusters into specific apoproteins. Consistent with these findings, we observed that NARFL failed to bind to CIAO1, MIP18, and MMS19 in NARFL-deletion HPMECs, as determined by immunoprecipitation. Notably, NARFL appeared to bind with CIAO1 first, as down-regulation of NARFL directly resulted in decreased CIAO1 expression, while the expression of MMS19 and MIP18 remained unaffected. Thus, NARFL deletion leads to the disruption of normal transmission of mitochondrial iron-sulfur clusters to CIA system-related proteins and the failure of iron-sulfur clusters to embed into specific apoproteins, ultimately affecting the synthesis and maturation of cytoplasmic iron-sulfur proteins (**Figure 5D**).

### **Deletion of *Ciao3* Results in Embryonic Mortality and Impaired Vascular Development in Mice**

In a study conducted by Song et al<sup>11</sup>., it was revealed that deletion of *Ciao3* (NARFL homolog) led to embryonic lethality, with all *Ciao3* knockout embryos being absorbed before 10.5 days of development. To further elucidate the underlying mechanism of lethality caused by *Ciao3*

knockout, embryos were collected at various time points including 8.5 days, 10.5 days, 12.5 days, and 13.5 days for genotype identification. The results demonstrated that *Ciao3* knockout embryos persisted until 12.5 days, while complete absorption of *Ciao3* knockout embryos occurred at 13.5 days and later stages (**Figure 6A**). Histological examination using hematoxylin and eosin (H&E) staining revealed significantly slower development and impaired vascular system development in *Ciao3* knockout embryos compared to wild-type embryos. The yolk sac blood vessels in homozygous *Ciao3* knockout mice displayed thinning, reduced branching, incomplete vascular network, decreased compactness, and blocked vascular development (**Figure 6B**). Based on these findings, we hypothesized that abnormal vascular development could be responsible for the lethality observed in *Ciao3* knockout mice. During embryogenesis, endothelial cells play a critical role in cardiovascular system development, with these cells originating from blood islands formed from the mesoderm. To validate our hypothesis, immunofluorescence staining was performed to detect CD31 (**Figure 6C**) and CD34 (**Figure 6D**) markers of endothelial progenitor cells in whole embryos. The findings revealed disordered vascular structures, damaged and irregular vascular lumens in *Ciao3*<sup>-/-</sup> mouse embryos. In contrast, wild-type mouse embryos exhibited well-connected vascular networks. Additionally, the positive staining intensity of CD31 in endothelial cells and endothelial progenitor cells was notably reduced in *Ciao3*<sup>-/-</sup> embryos. These observations indicated maturation defects in vascular endothelial progenitor cells and endothelial progenitor cells in *Ciao3*<sup>-/-</sup> embryos. Based on the results obtained from zebrafish and cell models, it is speculated that embryonic lethality resulting from *Ciao3* deletion may be attributed to increased oxidative stress and lipid peroxidation levels. To verify this hypothesis, the positive rates of 4-hydroxynonenal (4-HNE) (**Figure 6E**) and BODIPY (**Figure 6E**) were significantly higher in *Ciao3*<sup>-/-</sup> mouse embryos compared to wild-type embryos, as evidenced by fluorescence staining. Furthermore, using the  $\gamma$ -H2AX method, it was observed that DNA damage in *Ciao3*<sup>-/-</sup> mouse embryos was significantly augmented compared to wild-type embryos (**Figure 6H**).

### **Deletion of *Ciao3* Results in Altered Expression of Ferroptosis Pathway-Related Proteins in Mouse Embryos**

In our *in vitro* experimental cell model, we observed that down-regulation of NARFL resulted in decreased expression of GPX4, SLC7A11, and Ferritin, while the expression of TFR1 and IRP1 was upregulated. To investigate if a similar regulatory pathway exists *in vivo*, we performed Western blot experiments on 12.5-day-old wild-type embryos and *Ciao3* knockout mouse embryos. The analysis revealed that the expressions of GPX4, xCT, and FTL were down-regulated, whereas TFR1 and IRP1 were upregulated in *Ciao3* knockout mouse embryos.

These findings align with the results obtained from the cell model, suggesting that the deletion of *Ciao3* leads to the upregulation of IRP1 expression in the mice model. This, in turn, drives the upregulation of TFR1 expression and the downregulation of FTL expression. *Ciao3* deletion also inhibits the downregulation of xCT and GPX4 expression, resulting in the activation of the ferroptosis pathway (**Figure 6G, I**).

### **Impairment of Vascular Function in *Ciao3* Heterozygous Mice**

Although *Ciao3*<sup>+/-</sup> mice show minimal differences in appearance compared to wild-type mice, their activity levels visibly decrease from the 8th to 9th week of age. *Ciao3*<sup>+/-</sup> knockout mice also exhibit reduced activity compared to wild-type mice. At the 9th week, the heart, lung, and liver of mice from both groups were dissected and stained with H&E. No differences were observed in the heart and liver; however, significant differences were observed in the pulmonary vessels (**Figure 7A**). The lungs of *Ciao3*<sup>+/-</sup> mice were significantly thicker compared to those of wild-type mice. Immunohistochemical staining of endothelial cell marker CD31 showed even distribution and dense expression in the lung lobes of wild-type mice, while  $\alpha$ -smooth muscle actin ( $\alpha$ -SMA) expression was minimal (**Figure 7B**). In contrast, CD31 expression was significantly reduced, and  $\alpha$ -SMA expression was increased, in the lung lobes of *Ciao3*<sup>+/-</sup> mice. These findings suggest a decrease in endothelial cells and an increase in smooth muscle cells in the lungs of *Ciao3*<sup>+/-</sup> mice, which may contribute to thickening of the pulmonary artery wall and stenosis of the pulmonary artery lumen. To investigate whether vascular endothelial cell function was compromised in *Ciao3*<sup>+/-</sup> mice, angiogenesis and vascular permeation experiments were conducted. Aortic rings from mice were cultured in an extracellular matrix (ECM) medium for 4 days. The results revealed a significant reduction in the number of buds in the aortic rings of *Ciao3*<sup>+/-</sup> mice compared to wild-type mice (**Figure 7C-D**), indicative of inhibited angiogenesis in *Ciao3*<sup>+/-</sup> mice. Furthermore, vascular permeability assays using albumin-bound Evans Blue stain solution showed significantly darker staining in the aortic arch and cerebral vessels of *Ciao3*<sup>+/-</sup> mice compared to the control group, suggesting increased vascular permeability in *Ciao3*<sup>+/-</sup> mice. These results collectively indicate impaired vascular function in *Ciao3*-deficient mice.

### ***NARFL* Polymorphisms are Susceptible Sites for Vascular Endothelial Dysfunction Diseases**

A total of 387 cases of vascular endothelial dysfunction and 409 control individuals were included in this study. The control group consisted of 409 healthy individuals with an average age of  $48 \pm 12.5$  years, including 228 males and 181 females. The case group had a mean age of  $50 \pm 17.2$  years, including 216 males and 171 females. There were no significant differences in age and

sex distribution between the case and control groups. The basic characteristics of the 387 cases are provided in **Table S1**, where 20.4% were drinkers and 79.6% were non-drinkers. In addition, 38.2% were smokers and 61.8% were non-smokers. Among the cases, 187 patients had pulmonary hypertension with obvious pulmonary vein or pulmonary capillary involvement, 51 patients had neurodegenerative diseases, 39 patients had epilepsy, 66 patients had systemic lupus erythematosus, and 44 patients had rheumatoid arthritis and arteritis. Echocardiography revealed mild reflux in 167 cases (43.2%), moderate reflux in 75 cases (19.4%), and severe reflux in 10 cases (2.5%).

The study of NARFL originated from a rare family with pulmonary arterial hypertension secondary to diffuse pulmonary arteriovenous malformation, where a missense mutation on NARFL caused severe consequences. Typically, in genetic studies, we identify the pathogenic mutation of a gene through the phenotypic presentation in a family, and then explore the underlying pathogenic mechanism. Studying rare diseases and their pathogenesis is both challenging and meaningful. However, based on the phenotype observations of *Ciao3* hybrid mice at later stages, we questioned whether there are susceptible sites of *NARFL* gene polymorphisms that contribute to vascular endothelial dysfunction diseases. Although these susceptible sites may not cause severe phenotypes in rare PAH disease, they have the potential to increase susceptibility to endothelial dysfunction diseases.

Among the seven tagSNPs of *NARFL* (rs61112891, rs2071952, rs117952680, rs9928077, rs3752556, rs11248948, and chr16-731143), the distribution of rs117952680, rs2071952, rs61112891, and chr16-731143 showed statistical differences between cases and controls (**Figure 8A, Table S2**). The odds ratio (OR) values of rs117952680, rs2071952, and rs61112891 were greater than 1, indicating that these variants may act as risk factors for vascular endothelial dysfunction, while chr16-731143 had an OR value less than 1, indicating its potential role as a protective factor. Our genotype analysis revealed that individuals carrying the GG and CG genotypes of rs61112891 had a significantly increased risk for vascular endothelial dysfunction, with the OR of the GG genotype being 3.971 higher than the CG genotype (1.328). Moreover, carriers of the CT and TT genotypes of rs2071952 had a significantly increased risk for vascular endothelial dysfunction compared to controls, with no individuals in the control group found to have the TT genotype. Additionally, individuals carrying the GA genotype of rs117952680 had a significantly increased risk, with an OR value of 5.284. Furthermore, carriers of the GG genotype of rs11248948 had a significantly increased risk of vascular endothelial dysfunction, with no individuals in the control group found to have the GG genotype. Finally, carriers of the TC or CC genotypes of chr16-731143 had a reduced risk of vascular endothelial dysfunction, with an OR

value of 0.69. No differences in the genotype distributions of rs9928077 and rs3752556 were observed between the two groups. We further conducted a genotype frequency distribution analysis for seven tagSNPs in patients with various vascular endothelial dysfunction-related diseases, including pulmonary hypertension, neurodegenerative diseases, epilepsy, systemic lupus erythematosus, rheumatoid arthritis, and arteritis (**Figure 8B, Table S3**). Our results indicated that carrying the rs11248948 (GG) genotype significantly increased the risk of cerebral small vessel epilepsy (OR=3.588,  $p=1.293\times 10^{-12}$ ). Additionally, carrying the rs117952680 (GA) genotype significantly increased the risk of cerebral small vessel epilepsy (OR=5.826,  $p=0.005$ ), neurodegenerative diseases (OR=7.129,  $p=1.62\times 10^{-4}$ ), and pulmonary hypertension patients with obvious pulmonary vein or pulmonary capillary involvement (OR=6.318,  $p=1.175\times 10^{-7}$ ). Moreover, carrying the rs2071952 (TT or CT) genotype significantly increased the risk of cerebral small vessel epilepsy (OR=3.462,  $p=2.176\times 10^{-10}$ ), while carrying the rs611289 (GG or CG) genotype significantly increased the risk of cerebral vascular epilepsy (OR=2.699,  $p=3.982\times 10^{-8}$ ). On the other hand, carrying the chr16-731143 (TC or CC) genotype significantly reduced the risk of pulmonary hypertension (OR=0.669,  $p=0.002$ ), systemic lupus erythematosus (OR=0.546,  $p=0.005$ ), cerebral small vessel epilepsy (OR=0.489,  $p=0.015$ ), and rheumatoid arthritis and arteritis (OR=0.433,  $p=0.003$ ) in patients with obvious pulmonary vein or pulmonary capillary involvement. No significant differences were observed between the genotypes of other tagSNPs and the analyzed diseases. Furthermore, we analyzed the expression of NARFL in both the case and control groups, revealing significantly lower NARFL expression levels in the case group compared to the control group (**Figure 6B in the online-only Data Supplement**). Furthermore, a negative correlation was observed between NARFL expression levels and MDA, a biomarker associated with ferroptosis (**Figure 6C in the online-only Data Supplement**). The receiver operator characteristic (ROC) curve analysis showed that NARFL expression level was more effective in differentiating tagSNP groups, with an area under the curve (AUC) of 0.765, compared to MDA (AUC=0.540), indicating a lower discriminatory power for tagSNP groups (**Figure 6D in the online-only Data Supplement**). Collectively, these findings suggest that decreased NARFL expression may be associated with an increased risk of vascular endothelial dysfunction in individuals with specific tagSNPs.

## DISCUSSION

These findings demonstrate that *NARFL* gene knockout leads to endothelial dysfunction and further abnormal vascular development in HPMECs, zebrafish and mice. This is characterized by

a weak endothelial structure and decreased tube formation ability, which are the developmental structural basis for the death of homozygous gene knockout zebrafish and mouse embryos. In HPMECs cell model studies, it was found that the deletion of the *NARFL* gene prevents the transmission of mitochondrial synthesized ISC to CTC, resulting in the inability to form mature iron-sulfur proteins. ACO1, which acts as a representative of iron-sulfur protein, becomes an "RNA binding protein" IRP1 when cytoplasmic ACO1 cannot obtain ISC. IRP1 increases the expression of TFR1 and inhibits the expression of Ferritin, resulting in increased iron intake. This leads to increased intracellular iron ions, enhanced oxidative stress, and down-regulation of SCL7A11 and GPX4. The decrease in cytoplasmic glutathione and glutamine synthesis further increases the production of reactive oxygen species, activates lipid peroxidation, and induces vascular endothelial cell death and dysfunction. The *NARFL* gene polymorphisms rs11248948 (GG type), rs117952680 (GA type), rs2071952 (TT or CT type), and rs611289 (GG or CG) significantly increase the risk of cerebral small-vessel epilepsy, degenerative disease, and pulmonary hypertension, respectively (**Figure 8C**).

In the zebrafish model<sup>17</sup> of *NARFL* knockout and combined with Tg (*flk*: eGFP) model which is suitable for studying vascular development and morphology, it was found that *NARFL* gene knockout not only leads to death of juvenile fish but also epilepsy-like abnormal behavior, abnormal blood-brain barrier (BBB) morphology, and neuronal lesions. In Liu's study, *NARFL* mutations were also found in one epileptic family<sup>23</sup>. The pathogenesis of epilepsy is complex, and one of the mechanisms is the imbalance of central nervous system homeostasis caused by BBB injury<sup>15,24</sup>. Endothelial cells in the vascular barrier contain numerous ATP-binding cassette transporters (ABC transporters) that help maintain central nervous system homeostasis and prevent the passage of harmful substances through the BBB<sup>16</sup>. Furthermore, our research revealed that *NARFL* deletion led to abnormal vascular development and structure in zebrafish. Previous studies have already shown that knocking out *NARFL* resulted in abnormal intestinal vessels in zebrafish. To better understand the process of vascular development in zebrafish, we used the Tg (*flk*: eGFP) model and observed that *NARFL* deletion caused deformity or even absence of dorsal longitudinal anastomosis vessels and connecting cells, as well as distortion of the dorsal aorta and PCV. Subsequent experiments demonstrated that *NARFL* deletion led to increased oxidative stress, lipid peroxidation, and iron levels. It is speculated that the increase in lipid peroxidation, caused by the rise in free iron, along with the significant increase in oxidative stress, leads to injury of vascular endothelial cells in zebrafish and results in blood vessel malformation during development. When measuring the blood flow of zebrafish, we discovered that the blood flow of *narfl*<sup>-/-</sup> zebrafish significantly increased before 6 dpf, reached its peak at 6 dpf, and then

decreased significantly after 6 dpf. However, the blood flow velocity of wild zebrafish did not show significant changes. To investigate the underlying reasons, we examined the functional markers ET-1 and NO in endothelial cells and found that ET-1, responsible for vasoconstriction, increased significantly at 6 dpf, while NO, responsible for vasorelaxation, decreased significantly at 6 dpf. This phenomenon, however, did not occur at 4 dpf. We hypothesize that endothelial cells compensate for the injury before 6 dpf, but at 6 dpf, the relaxation and contraction functions of endothelial cells are significantly impaired. Almost all *narfl*<sup>-/-</sup> zebrafish died before 13 dpf, indicating that *narfl* deficiency seriously damages the function of vascular endothelial cells. Furthermore, our observations revealed that the dorsal aorta and posterior aorta of *narfl*<sup>-/-</sup> zebrafish did not fuse to form a regular circular circulation, as seen in wild-type zebrafish. Instead, they formed a distorted and disorganized shape. The formation of the dorsal aorta and PCV occurs during the early embryonic angiogenesis stage. When zebrafish reaches approximately 15 nodules, angioblasts in the middle layer of the lateral plate converge at the midline to form the dorsal aorta and PCV<sup>25</sup>. However, in *narfl*<sup>-/-</sup> zebrafish, abnormalities occur during the process of angiogenesis, generation, and differentiation, disrupting the normal development of the vascular network.

Transcriptome sequencing revealed that *cyp2p8* in zebrafish (CYP2J2 in humans) is an important cytochrome P450 monooxygenase involved in the metabolism of polyunsaturated fatty acids (PUFA) in the cardiovascular system<sup>26, 27</sup>. The mechanism of action for *cyp2p8* involves using molecular oxygen to insert an oxygen atom into the substrate and reducing the second oxygen atom into water molecules. NADPH, provided by cytochrome P450 reductase (NADPH-cytochrome P450 reductase), supplies two electrons necessary for the epoxidation of PUFA double bonds. This conversion leads to the formation of four regionally isomeric Epoxyeicosatrienoic acids (EETs), which may play a crucial role in the epoxidation of endogenous cardiac arachidonic acid pools. CYP2J2 is widely expressed in vascular endothelial cells<sup>28</sup>. It and its products have been found to exert protective effects on vascular injury. CYP2J2 can convert hydrogen peroxide into hydroxyepoxy metabolites and participate in eicosanoic acid metabolism. It can also interact with 15-lipoxygenase to metabolize arachidonic acid and convert hydroperoxicosatetraenoates (HpETEs) into hydroxy epoxy eicosatrienoates (HEETs)<sup>29</sup>. HEETs have been shown to play a protective role in vascular injury through various mechanisms, including anti-inflammation, anti-apoptosis, and inhibition of vascular endothelial cell aging<sup>29, 30</sup>. In summary, a decrease in the expression of CYP2J2 results in a reduction in HEET levels, thereby diminishing the protective effect on blood vessels. Through qRT-PCR and WISH experiments, it was found that *cyp2p8* (CYP2J2 in humans) is expressed in the blood vessels of wild zebrafish. However, the expression of *cyp2p8* in *NARFL*<sup>-/-</sup> zebrafish blood vessels was



significantly decreased, suggesting a potential link between NARFL deficiency and impaired metabolism of PUFA in the cardiovascular system. Further research is required to fully understand the role of NARFL and its interaction with *cyp2p8/CYP2J2* in vascular development and homeostasis.

In the preface, it is mentioned that the deletion of NARFL hinders the transmission of ISC to the IRP1 protein. As a result, ACO1 loses ISC and becomes IRP1, leading to a decrease in ACO1 activity. Previous studies have reported similar phenotypes when mitochondrial ISC synthesis-related proteins are deleted in both lower yeast and higher mammalian cells<sup>31-34</sup>. These phenotypes include excessive iron in mitochondria, increased oxidative stress, blocked electron transmission, and decreased mitochondrial function. Additionally, a decrease in cytoplasmic iron levels up-regulates IRP1 activity, resulting in increased iron uptake. Our research found that the deletion of NARFL does not affect mitochondrial cis-aconitase activity but decreases cytoplasmic cis-aconitase activity. This leads to iron overload, which prompted us to investigate whether mitochondrial function is affected by NARFL. By using the seahorse XFe analyzer, we observed a decrease in mitochondrial respiratory function due to NARFL deletion. We speculate that this mechanism may be attributed to the increased activity of IRP1 caused by NARFL deletion. This leads to the up-regulation of transferrin receptor (TFR) expression, resulting in increased intracellular iron uptake. However, the iron obtained from mitochondria cannot be effectively utilized, leading to aggravated iron overload, increased oxidative stress, and hindered electron transfer within mitochondria. To verify this mechanism, further cell experiments are needed.

Corbin et al. conducted a genome-wide DNA and RNA array analysis combined with functional genomics research and discovered that *NARFL* gene overexpression was present in two oxygen-resistant strains of HeLa cells. They also found that hyperoxia-induced overexpression of NARFL can protect the activity of iron-sulfur proteins, specifically ACO1, highlighting the crucial role of *NARFL* in resisting oxidative stress caused by hyperoxia<sup>35-37</sup>. Furthermore, similar to the results obtained from knocking out the NARFL homologue Nar1 in yeast, it was found that NARFL deletion leads to defects in cytoplasmic iron-sulfur protein assembly, ultimately resulting in cellular and organismal death. This further confirms the significant role of NARFL in the cytoplasmic iron-sulfur protein assembly pathway<sup>38</sup>. In a study by Fan XR et al<sup>38</sup> it was discovered that the NARFL-S161I mutant was unable to bind to the functional CIA complex. It was speculated that this mechanism could be related to the development of diffuse pulmonary arteriovenous malformation, a condition associated with this specific mutation, which was first identified by the researchers. This study also revealed that the association between NARFL and the CIA complex is closely linked to cellular iron levels. The binding of NARFL to the CIA

complex was found to be influenced by oxidative stress levels and hypoxia. Specifically, the interaction between NARFL and the CIA complex was enhanced when iron supplementation or hypoxic conditions were introduced, while the presence of reactive oxygen species weakened the interaction between NARFL and the components of the CIA complex.

According to the results of experiments on zebrafish and cell models, it can be concluded that NARFL plays a crucial role in maintaining iron homeostasis in cells. Under normal conditions, NARFL facilitates the transfer of iron-sulfur clusters (ISC) synthesized in mitochondria to the cytoplasmic iron-sulfur protein assembly complex (CTC). The CTC is composed of CIAO1, MIP18, and MMS19 and interacts with CIAO1 to form mature iron-sulfur proteins and maintain iron balance in cells. However, in the absence of NARFL, ISC cannot effectively transfer to the CTC, resulting in the inability to form mature iron-sulfur proteins. One example is ACO1, an iron and sulfur representative that acts as both an enzyme and an "RNA binding protein" IRP1. Without ISC, cytoplasmic ACO1 cannot function properly and instead acts as IRP1. IRP1 then increases the expression of transferrin receptor 1 (TFR1) and inhibits the expression of ferritin, leading to increased iron uptake in cells. The decrease in ferritin levels prevents the normal binding and storage of iron, resulting in an increase in intracellular iron ions and significant oxidative stress through the Fenton reaction. The down-regulation of SCL7A11, GPX4, and CYP2J2, along with the decrease in glutathione and glutamine synthesis in the cytoplasm, further enhances the production of reactive oxygen species (ROS) and activates lipid peroxidation. This ultimately leads to ferroptosis-induced vascular endothelial cell death and dysfunction. ACO1 serves as a crucial link between iron metabolism balance and the oxidative stress signaling pathway. The decrease in ACO1 activity and the increase in free iron content in the cytoplasm promote ROS production. In the cytoplasm, IRP1 acts as an iron receptor. When cellular iron levels increase, IRP1 binds to [4Fe-4S] clusters and converts into ACO1. Conversely, when cellular iron levels decrease, IRP1 dissociates from [4Fe-4S] clusters and binds to iron-responsive elements (IREs) in the non-coding region of iron metabolism-related protein mRNA. This binding promotes iron absorption and reduces iron storage in cells, thereby restoring cellular iron levels. Notably, the mRNA of transferrin receptor (TFR) contains five IRE structures in its 3'UTR. When iron-deficient, IRP can bind to these IREs and protect TFR mRNA from degradation, leading to an increase in TFR levels and iron absorption in cells. The IRE of ferritin is present in its 5'UTR, and when iron-deficient, IRP1 binds to the ferritin IRE, reducing ferritin synthesis and resulting in decreased iron storage and utilization in cells<sup>39</sup>. *NARFL* plays a critical role in maintaining this delicate balance. Once *NARFL* is deleted, this balance is disrupted, leading to dysregulation of iron metabolism and oxidative stress in cells.

Song et al. is the only team that has completed the research report of mice *Ciao3* gene knockout<sup>11</sup>. The team discovered that mice embryos died 10.5 days after the knockout of the *Ciao3* gene. Additionally, inducing acute knockout of *Ciao3* in adult mice resulted in their death, along with a significant decrease in cytoplasmic aconitase activity in their liver. Knockout of *Ciao3* in mice embryonic fibroblasts led to a decrease in cytoplasmic aconitase activity and cell viability<sup>11</sup>. We observed that *Ciao3*<sup>-/-</sup> mice died or were absorbed in the early embryonic stage (E 12.5 and before), which aligns with Song's conclusion that *Ciao3*<sup>-/-</sup> mice embryos died or were absorbed before 10.5 days. As the occurrence of blood vessels is one of the earliest events in embryonic development, with mesodermal cells differentiating into vascular cells such as hematopoietic progenitor cells and endothelial progenitor cells from the 7th day, we speculate that *Ciao3* deletion could damage endothelial progenitor cells. Our findings indicate that *Ciao3*<sup>-/-</sup> mice embryonic endothelial progenitor cells indeed exhibited maturation defects, resulting in a failure to connect endothelial cells into a vascular network in the early embryo. Previous reports have shown that vascular endothelial progenitor cells form a functional circulation in the early stage<sup>40</sup>. Vascular progenitor cells respond to basic fibroblast growth factor and bone morphogenetic protein 4 in the posterior primitive stripe as *flk1*-positive mesodermal cells, which produce blood and endothelial cells simultaneously. However, after migrating to the outer and inner embryos, they are limited to either hematopoiesis or angiogenesis<sup>41</sup>. In the yolk sac, these endothelial progenitor cells aggregate into endothelial-lined blood islands, which then fuse to form a primary capillary plexus. This plexus undergoes remodeling with intracellular blood vessels to form a mature circulation. If the maturation cycle of endothelial progenitor cell formation is not established, the embryo ceases to develop and dies<sup>42, 43</sup>.

Compared to wild-type embryos, we observed a significant increase in oxidative stress levels, lipid peroxidation levels, and DNA double-strand breaks in *Ciao3*<sup>-/-</sup> mouse embryos. Excessive reactive oxygen species (ROS) during embryonic development can cause damage to DNA, proteins, and lipids, leading to mitochondrial damage. Mitochondrial DNA is essential for oxidative phosphorylation, and defects in embryonic mitochondrial DNA can result in metabolic dysfunction, embryo damage, developmental retardation, and even developmental stagnation<sup>44</sup>. The production of ROS is influenced by various factors, and the amount of ROS produced varies during different stages of embryo development. In mice embryos, ROS production is highest during fertilization and the G2/M stage of the second cell division, and iron ions can directly act on lipids and amplify the peroxidation damage caused by free hydroxyl radicals<sup>45</sup>. Lipids play a crucial role in constituting the cytoskeleton, and lipid peroxidation occurs when polyunsaturated fatty acids combine with oxygen free radicals *in vivo*. Excessive oxidative

stress leads to an increase in lipid peroxidation, which can dissolve polyunsaturated fatty acids in the cell membrane, disrupt cell membrane structure, alter cell membrane fluidity and permeability, and affect the transfer of cell metabolites and cell signal transduction<sup>46</sup>. Embryonic developmental stagnation is a self-protection mechanism to prevent abnormal or low-quality embryos from continuing to develop. Western blot experiments demonstrated that GPX4, xCT, and FTL expressions were down-regulated in *Ciao3*<sup>-/-</sup> mouse embryos, while the expression of TFR1 and IRP1 was up-regulated, consistent with the results of the cell model. Therefore, we infer that *Ciao3* deletion leads to the up-regulation of IRP1 expression in the mouse model, which further up-regulates TFR1 expression and down-regulates FTL expression. *Ciao3* deletion also induces the down-regulation of xCT and GPX4 expression, activating the ferroptosis pathway, increasing oxidative stress levels and lipid peroxidation levels in *Ciao3*<sup>-/-</sup> embryo endothelial progenitor cells, obstructing the maturation and circulation of endothelial progenitor cells, and ultimately resulting in early embryo death. We observed that the surface of *Ciao3*<sup>+/-</sup> mice did not differ significantly from that of wild-type mice, but we did observe obvious endothelial cell injury in the lungs of *Ciao3*<sup>+/-</sup> mice in the later stage. There was evident thickening of the wall of pulmonary blood vessels, a decrease in endothelial cells, and an increase in smooth muscle. In the mouse model, we also found that the absence of *Ciao3* leads to impaired maturation and differentiation of endothelial progenitor cells. Endothelial progenitor cells differentiate into veins and arteries and gather in primitive capillaries. Neovascularization initially consists of endothelial cells. Vascular maturation requires the interaction of vascular and arterial factors for a sufficient duration, allowing endothelial cells to be tightened and covered by pericytes and extracellular matrix. If endothelial cells are damaged, blood vessels may leak, become fragile, easily rupture and bleed, leading to reduced blood flow and vascular degeneration<sup>47-49</sup>.

Gene Curation<sup>50</sup> is a process that involves extracting information from literature and databases to evaluate the strength of the "gene-disease" relationship based on current research. According to the ClinGen Gene Curation Standardized Evidence SOP version 8, NARFL has been reported in relation to pulmonary hypertension secondary to diffuse pulmonary arteriovenous malformation. Based on this evidence, NARFL is strongly associated with this condition. When the *NARFL* gene is knocked out, it can induce ferroptosis and increase oxidative stress levels, leading to endothelial cell injury. Additionally, certain susceptible sites in the *NARFL* gene polymorphism can increase the risk of vascular endothelial dysfunction diseases. Our findings indicate that carrying specific tagSNPs in the non-coding region of *NARFL* can significantly increase the risk of cerebral small vessel disease, cerebral vascular epilepsy, degenerative diseases, and pulmonary hypertension with pulmonary vein or pulmonary capillary involvement. Although these tagSNPs are located in

the non-coding region of NARFL, our later study revealed that the expression of NARFL was significantly lower in the case group compared to the control group. The expression levels of NARFL were more effective in predicting the presence of dangerous tagSNPs in the case group compared to MDA. However, it is still unclear whether these tagSNPs directly reduce the expression level of NARFL, and further evidence is needed to confirm this. The diseases most strongly associated with NARFL gene tagSNPs include cerebral small vessel epilepsy, degenerative diseases, and pulmonary hypertension with pulmonary vein or pulmonary capillary involvement. This is consistent with our previous findings in zebrafish and mouse models. Due to the limited number of specimens in this study, it is necessary to collect more samples to verify the associations between specific tagSNPs and the mentioned diseases. Due to the constrained number of specimens obtained in this research, there is a pressing need to gather additional samples. This will enable a more robust validation of whether individuals carrying the rs11248948 (GG), rs2071952 (TT), and rs611289 (GG) polymorphisms are at heightened risk for cerebellar vascular epilepsy. Furthermore, it's imperative to investigate whether carriers of the rs117952680 (GA) variant are more susceptible to cerebellar vascular epilepsy and neurodegenerative diseases, as well as to pulmonary hypertension characterized by pronounced pulmonary vein or capillary involvement.

### **Authors**

Hui Hu, MD, PhD; Jing Luo, MD, PhD; Li Yu, MD; Daoxi Qi, MD; Boyu Li, MD; Yating Chen, MD; Xiaokang Zhang, MD; Chen Wang, MD, PhD; Fan Wang, MD; Zhan Yin, PhD; Fang Zheng, MD, PhD.

### **Correspondence**

Fang Zheng, MD, PhD, Center for Gene Diagnosis, Zhongnan Hospital of Wuhan University, Wuhan, Hubei, 430071, China. Email [zhengfang@whu.edu.cn](mailto:zhengfang@whu.edu.cn).

Zhan Yin, PhD, State Key Laboratory of Freshwater Ecology and Biotechnology, Institute of Hydrobiology, Chinese Academy of Sciences, Wuhan, Hubei, 430072, China, Email [zyin@ihb.ac.cn](mailto:zyin@ihb.ac.cn).

### **Sources of Funding**

This work was supported by grants from the National Natural Science Foundation of China (No. 81472024 and No. 81871722) and Science and technology innovation Cultivation Fund of Zhongnan Hospital of Wuhan University No. CXPY2022050.

### **Declaration of competing interest**

The authors declare no conflicts of interest.

## **REFERENCES**

1. Liu H, Du C, Luo J, Qiu X, Li Z, Lou Q, Yin Z and Zheng F. A novel mutation in nuclear prelamin a recognition factor-like causes diffuse pulmonary arteriovenous malformations. *Oncotarget*. 2017;8:2708-2718.
2. Kassube SA and Thoma NH. Structural insights into Fe-S protein biogenesis by the CIA targeting complex. *Nat Struct Mol Biol*. 2020;27:735-742.
3. Seki M, Takeda Y, Iwai K and Tanaka K. IOP1 protein is an external component of the human cytosolic iron-sulfur cluster assembly (CIA) machinery and functions in the MMS19 protein-dependent CIA pathway. *J Biol Chem*. 2013;288:16680-16689.
4. Rouault TA and Maio N. Biogenesis and functions of mammalian iron-sulfur proteins in the regulation of iron homeostasis and pivotal metabolic pathways. *J Biol Chem*. 2017;292:12744-12753.
5. Lill R, Broderick JB and Dean DR. Special issue on iron-sulfur proteins: Structure, function, biogenesis and diseases. *Biochimica et Biophysica Acta (BBA) - Molecular Cell Research*. 2015;1853:1251-1252.
6. Talib EA and Outten CE. Iron-sulfur cluster biogenesis, trafficking, and signaling: Roles for CGFS glutaredoxins and BolA proteins. *Biochim Biophys Acta Mol Cell Res*. 2021;1868:118847.
7. Braymer J, Freibert S, Rakwalska-Bange M and Lill R. Mechanistic concepts of iron-sulfur protein biogenesis in Biology. *Biochimica et biophysica acta Molecular cell research*. 2021;1868:118863.
8. Mühlenhoff U, Hoffmann B, Richter N, Rietzschel N, Spantgar F, Stehling O, Uzarska M and Lill R. Compartmentalization of iron between mitochondria and the cytosol and its regulation. *European journal of cell biology*. 2015;94:292-308.
9. van Wietmarschen N, Moradian A, Morin GB, Lansdorp PM and Uringa E-J. The Mammalian Proteins MMS19, MIP18, and ANT2 Are Involved in Cytoplasmic Iron-Sulfur Cluster Protein Assembly. *Journal of Biological Chemistry*. 2012;287:43351-43358.
10. Gari K, Leon Ortiz AM, Borel V, Flynn H, Skehel JM and Boulton SJ. MMS19 links cytoplasmic iron-sulfur cluster assembly to DNA metabolism. *Science*. 2012;337:243-5.
11. Song D and Lee FS. Mouse knock-out of IOP1 protein reveals its essential role in mammalian cytosolic iron-sulfur protein biogenesis. *J Biol Chem*. 2011;286:15797-805.
12. Hider R, Aviles MV, Chen YL and Latunde-Dada GO. The Role of GSH in Intracellular Iron Trafficking. *Int J Mol Sci*. 2021;22.
13. Brown NM, Kennedy MC, Antholine WE, Eisenstein RS and Walden WE. Detection of a [3Fe-4S] cluster intermediate of cytosolic aconitase in yeast expressing iron regulatory protein 1. Insights into the mechanism of Fe-S cluster cycling. *J Biol Chem*. 2002;277:7246-54.
14. Gu W, Fillebeen C and Pantopoulos K. Human IRP1 Translocates to the Nucleus in a Cell-Specific and Iron-Dependent Manner. *Int J Mol Sci*. 2022;23.
15. Dadas A and Janigro D. Breakdown of blood brain barrier as a mechanism of post-traumatic epilepsy. *Neurobiol Dis*. 2019;123:20-26.
16. Deng X, Xie Y and Chen Y. Effect of Neuroinflammation on ABC Transporters: Possible Contribution to Refractory Epilepsy. *CNS & neurological disorders drug targets*. 2018;17:728-735.
17. Luo J, Zhang X, He S, Lou Q, Zhai G, Shi C, Yin Z and Zheng F. Deletion of narfl leads to increased oxidative stress mediated abnormal angiogenesis and digestive organ defects in zebrafish. *Redox Biol*. 2020;28:101355.
18. Gao M, Yi J, Zhu J, Minikes AM, Monian P, Thompson CB and Jiang X. Role of Mitochondria in Ferroptosis. *Mol Cell*. 2019;73:354-363 e3.
19. Dixon SJ, Lemberg KM, Lamprecht MR, Skouta R, Zaitsev EM, Gleason CE, Patel DN, Bauer AJ, Cantley AM, Yang WS, Morrison B, 3rd and Stockwell BR. Ferroptosis: an iron-dependent form of nonapoptotic cell death. *Cell*. 2012;149:1060-72.
20. Culley MK, Zhao J, Tai YY, Tang Y, Perk D, Negi V, Yu Q, Woodcock CC, Handen A, Speyer G, Kim S, Lai YC, Satoh T, Watson AM, Aaraj YA, Sembrat J, Rojas M, Goncharov D, Goncharova EA, Khan OF, Anderson DG, Dahlman JE, Gurkar AU, Lafyatis R, Fayyaz AU, Redfield MM, Gladwin MT, Rabinovitch M, Gu M, Bertero T and Chan SY. Frataxin deficiency promotes endothelial senescence in pulmonary hypertension. *J Clin Invest*. 2021;131.
21. Hassannia B, Vandenabeele P and Vanden Berghe T. Targeting Ferroptosis to Iron Out Cancer. *Cancer cell*. 2019;35:830-849.
22. Zhang Z, Tang J, Song J, Xie M, Liu Y, Dong Z, Liu X, Li X, Zhang M, Chen Y, Shi H and Zhong J. Elabela alleviates ferroptosis, myocardial remodeling, fibrosis and heart dysfunction in

- hypertensive mice by modulating the IL-6/STAT3/GPX4 signaling. *Free Radic Biol Med*. 2022;181:130-142.
23. Du S, Zeng S, Song L, Ma H, Chen R, Luo J, Wang X, Ma T, Xu X, Sun H, Yi P, Guo J, Huang Y, Liu M, Wang T, Liao W, Zhang L, Liu J and Tang B. Functional characterization of novel NPRL3 mutations identified in three families with focal epilepsy. *Science China Life sciences*. 2023;66:2152-2166.
24. Sweeney MD, Zhao Z, Montagne A, Nelson AR and Zlokovic BV. Blood-Brain Barrier: From Physiology to Disease and Back. *Physiological Reviews*. 2019;99:21-78.
25. Jerafi-Vider A, Bassi I, Moshe N, Tevet Y, Hen G, Splittstoesser D, Shin M, Lawson ND and Yaniv K. VEGFC/FLT4-induced cell-cycle arrest mediates sprouting and differentiation of venous and lymphatic endothelial cells. *Cell Rep*. 2021;35:109255.
26. Wu S, Moomaw C, Tomer K, Falck J and Zeldin D. Molecular cloning and expression of CYP2J2, a human cytochrome P450 arachidonic acid epoxygenase highly expressed in heart. *The Journal of biological chemistry*. 1996;271:3460-8.
27. Lucas D, Goulitquer S, Marienhagen J, Fer M, Dreano Y, Schwaneberg U, Amet Y and Corcos L. Stereoselective epoxidation of the last double bond of polyunsaturated fatty acids by human cytochromes P450. *J Lipid Res*. 2010;51:1125-33.
28. Imaoka S, Hashizume T and Funae Y. Localization of rat cytochrome P450 in various tissues and comparison of arachidonic acid metabolism by rat P450 with that by human P450 orthologs. *Drug Metab Pharmacokinet*. 2005;20:478-84.
29. Chamboko CR, Veldman W, Tata RB, Schoeberl B and Tastan Bishop O. Human Cytochrome P450 1, 2, 3 Families as Pharmacogenes with Emphases on Their Antimalarial and Antituberculosis Drugs and Prevalent African Alleles. *Int J Mol Sci*. 2023;24.
30. Zhao Q, Huang J, Wang D, Chen L, Sun D and Zhao C. Endothelium-specific CYP2J2 overexpression improves cardiac dysfunction by promoting angiogenesis via Jagged1/Notch1 signaling. *J Mol Cell Cardiol*. 2018;123:118-127.
31. Haunhorst P, Hanschmann EM, Brautigam L, Stehling O, Hoffmann B, Muhlenhoff U, Lill R, Berndt C and Lillig CH. Crucial function of vertebrate glutaredoxin 3 (PICOT) in iron homeostasis and hemoglobin maturation. *Mol Biol Cell*. 2013;24:1895-903.
32. Ye H, Jeong SY, Ghosh MC, Kovtunovych G, Silvestri L, Ortillo D, Uchida N, Tisdale J, Camaschella C and Rouault TA. Glutaredoxin 5 deficiency causes sideroblastic anemia by specifically impairing heme biosynthesis and depleting cytosolic iron in human erythroblasts. *J Clin Invest*. 2010;120:1749-61.
33. Jain A, Singh A, Maio N and Rouault TA. Assembly of the [4Fe-4S] cluster of NFU1 requires the coordinated donation of two [2Fe-2S] clusters from the scaffold proteins, ISCU2 and ISCA1. *Hum Mol Genet*. 2020;29:3165-3182.
34. Yu Q, Tai YY, Tang Y, Zhao J, Negi V, Culley MK, Pilli J, Sun W, Brugger K, Mayr J, Saggari R, Saggari R, Wallace WD, Ross DJ, Waxman AB, Wendell SG, Mullett SJ, Sembrat J, Rojas M, Khan OF, Dahlman JE, Sugahara M, Kagiya N, Satoh T, Zhang M, Feng N, Gorcsan J, 3rd, Vargas SO, Haley KJ, Kumar R, Graham BB, Langer R, Anderson DG, Wang B, Shiva S, Bertero T and Chan SY. BOLA (BOLA Family Member 3) Deficiency Controls Endothelial Metabolism and Glycine Homeostasis in Pulmonary Hypertension. *Circulation*. 2019;139:2238-2255.
35. Huang J, Song D, Flores A, Zhao Q, Mooney SM, Shaw LM and Lee FS. IOP1, a novel hydrogenase-like protein that modulates hypoxia-inducible factor-1alpha activity. *Biochem J*. 2007;401:341-52.
36. Netz DJ, Pierik AJ, Stumpfig M, Muhlenhoff U and Lill R. The Cfd1-Nbp35 complex acts as a scaffold for iron-sulfur protein assembly in the yeast cytosol. *Nat Chem Biol*. 2007;3:278-86.
37. Balk J, Pierik AJ, Netz DJ, Muhlenhoff U and Lill R. The hydrogenase-like Nar1p is essential for maturation of cytosolic and nuclear iron-sulphur proteins. *EMBO J*. 2004;23:2105-15.
38. Fan X, Barshop WD, Vashisht AA, Pandey V, Leal S, Rayatpisheh S, Jami-Alahmadi Y, Sha J and Wohlschlegel JA. Iron-regulated assembly of the cytosolic iron-sulfur cluster biogenesis machinery. *J Biol Chem*. 2022;298:102094.
39. Niu L, Ye C, Sun Y, Peng T, Yang S, Wang W and Li H. Mutant huntingtin induces iron overload via up-regulating IRP1 in Huntington's disease. *Cell Biosci*. 2018;8:41.
40. Coultas L, Chawengsaksophak K and Rossant J. Endothelial cells and VEGF in vascular development. *Nature*. 2005;438:937-45.
41. Zhu HL, Shi XT, Xu XF, Zhou GX, Xiong YW, Yi SJ, Liu WB, Dai LM, Cao XL, Xu DX and Wang H. Melatonin protects against environmental stress-induced fetal growth restriction via

suppressing ROS-mediated GCN2/ATF4/BNIP3-dependent mitophagy in placental trophoblasts. *Redox Biol.* 2021;40:101854.

42. Negretti N, Plosa E, Benjamin J, Schuler B, Habermann A, Jetter C, Gulleman P, Bunn C, Hackett A, Ransom M, Taylor C, Nichols D, Matlock B, Guttentag S, Blackwell T, Banovich N, Kropski J and Sucre J. A single-cell atlas of mouse lung development. *Development (Cambridge, England)*. 2021;148.

43. Patel SH, Christodoulou C, Weinreb C, Yu Q, da Rocha EL, Pepe-Mooney BJ, Bowling S, Li L, Osorio FG, Daley GQ and Camargo FD. Lifelong multilineage contribution by embryonic-born blood progenitors. *Nature*. 2022;606:747-753.

44. Jamil M, Debbarh H, Aboulmaouahib S, Aniq Filali O, Mounaji K, Zarqaoui M, Saadani B, Louanjli N and Cadi R. Reactive oxygen species in reproduction: harmful, essential or both? *Zygote*. 2020;28:255-269.

45. Guérin P, El Mouatassim S and Ménézo Y. Oxidative stress and protection against reactive oxygen species in the pre-implantation embryo and its surroundings. *Human reproduction update*. 2001;7:175-89.

46. Noda Y, Matsumoto H, Umaoka Y, Tatsumi K, Kishi J and Mori T. Involvement of superoxide radicals in the mouse two-cell block. *Molecular reproduction and development*. 1991;28:356-60.

47. Godo S and Shimokawa H. Endothelial Functions. *Arterioscler Thromb Vasc Biol*. 2017;37:e108-e114.

48. Zheng Z, Liu L, Zhou K, Ding L, Zeng J and Zhang W. Anti-Oxidant and Anti-Endothelial Dysfunctional Properties of Nano-Selenium in vitro and in vivo of Hyperhomocysteinemic Rats. *Int J Nanomedicine*. 2020;15:4501-4521.

49. Cyr AR, Huckaby LV, Shiva SS and Zuckerbraun BS. Nitric Oxide and Endothelial Dysfunction. *Crit Care Clin*. 2020;36:307-321.

50. Flowers M, Dickson A, Miller M, Spector E, Enns G, Baudet H, Pasquali M, Racacho L, Sadre-Bazzaz K, Wen T, Fogarty M, Fernandez R, Weaver M, Feigenbaum A, Graham B and Mao R. Specifications of the ACMG/AMP guidelines for ACADVL variant interpretation. *Molecular genetics and metabolism*. 2023;140:107668.



1

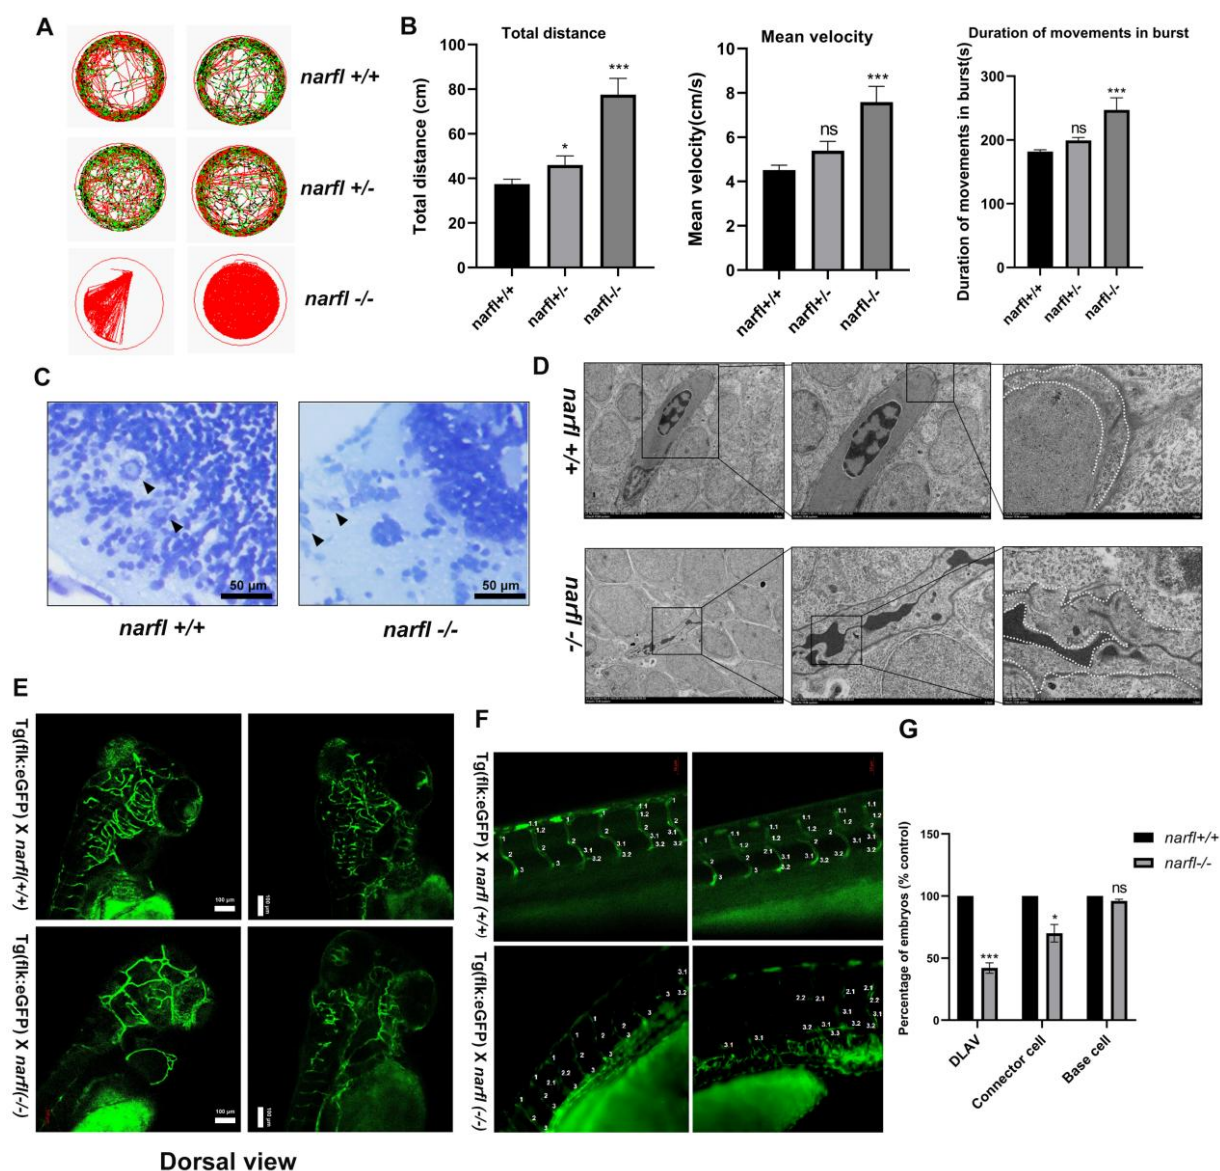

2

3 **Figure 1: Narfl Deficiency Results in Abnormal Behavior, Abnormal Blood Vessels, and**  
 4 **Neurons in Zebrafish.** (A) Swimming behavior trajectories of zebrafish with different genotypes  
 5 under normal lighting conditions. (B) Swimming behavior analysis of zebrafish with different  
 6 genotypes within 60 minutes under normal lighting, including total swimming distance, average  
 7 swimming speed, and burst duration. (C) Toluidine blue staining was performed to assess Nissl  
 8 body morphology in the brains of zebrafish with different genotypes. (D) Transmission electron  
 9 microscopy (TEM) was used to observe the ultrastructure of the blood-brain barrier in the brains  
 10 of zebrafish with different genotypes at magnifications of 1500×, 5000×, and 10000×, respectively.  
 11 (E) Fluorescence inverted microscope imaging system (dorsal view) was utilized to observe the  
 12 cerebral vascular morphology of zebrafish with different genotypes. (F) Fluorescence confocal

13 microscopy imaging and quantitative analysis of zebrafish vascular segments revealed the absence  
14 of junction cells in the *narfl*<sup>-/-</sup> dorsal longitudinal anastomosis. (G) Disordered or absent  
15 connective cells were observed in the *narfl*<sup>-/-</sup> zebrafish dorsal longitudinal anastomosis vessels,  
16 along with disordered and distorted structures of the dorsal aorta and PCV.

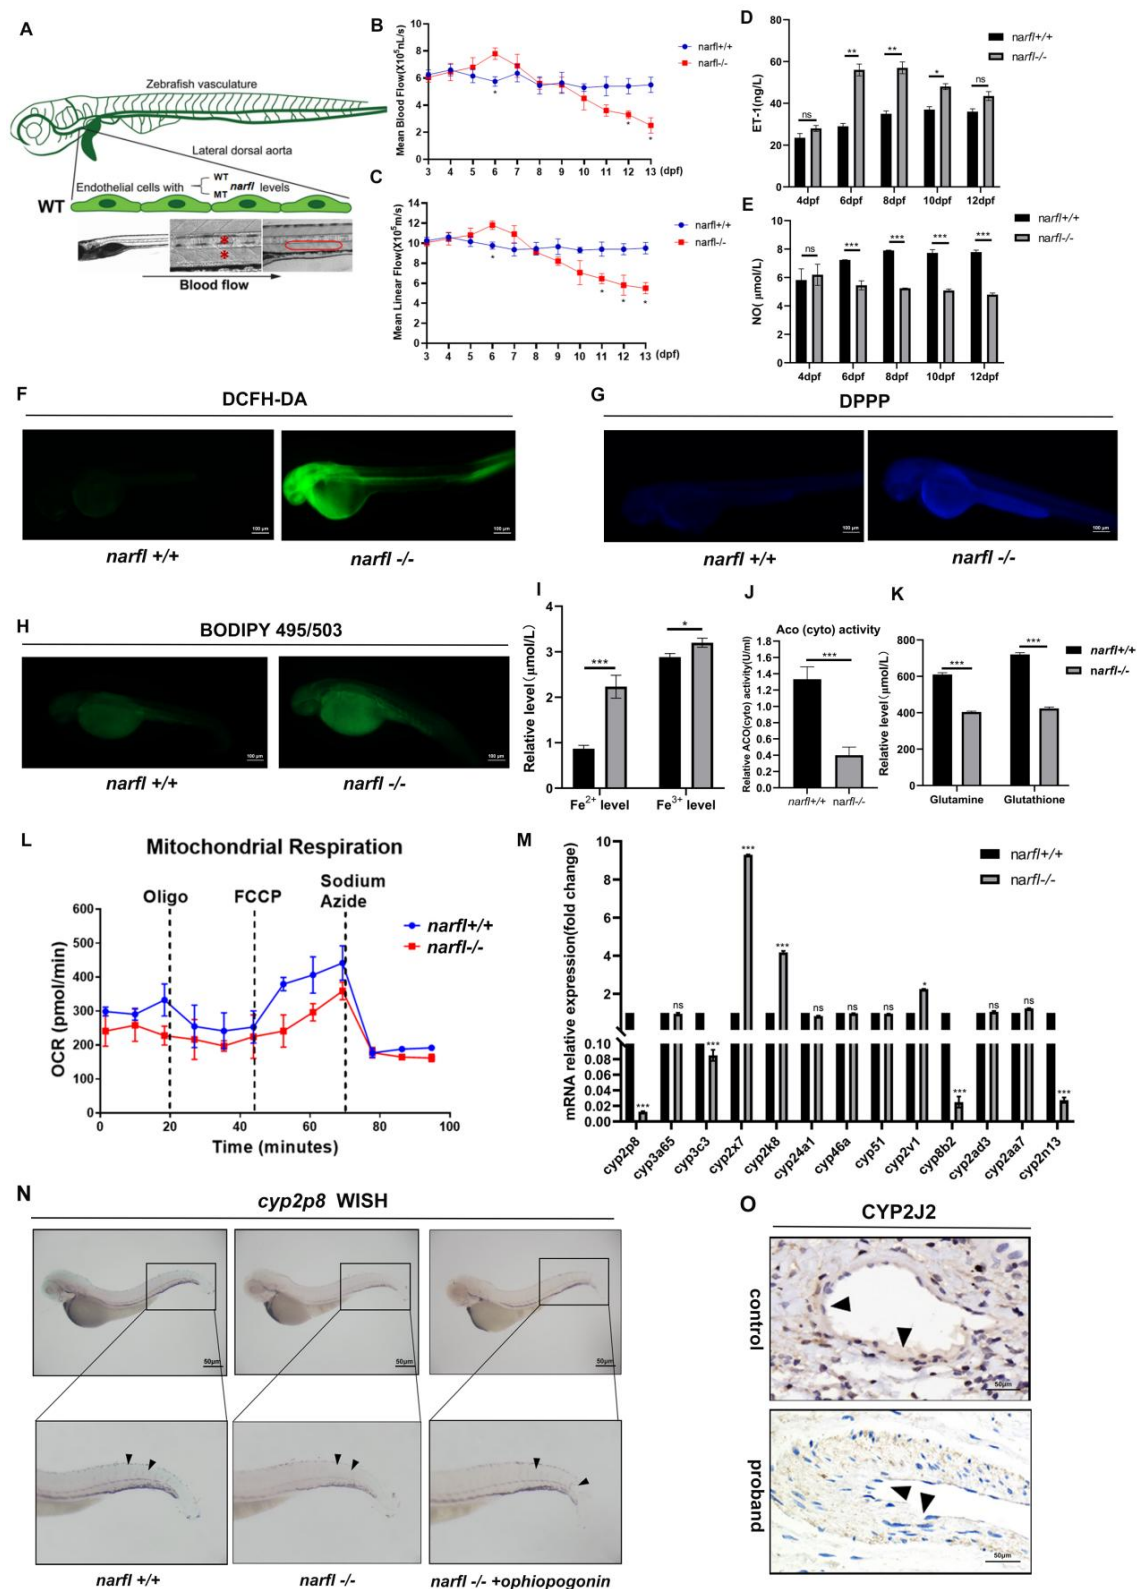

18 **Figure 2: Narfl Deficiency Activates Zebrafish Endothelial Dysfunction by Upregulating**  
19 **Iron Level, Reactive Oxygen Species Production, and Lipid Peroxidation. (A)** The Micro  
20 Zebra Lab system detected the blood flow of zebrafish, with the red asterisk denoting line speed  
21 and the red box denoting average speed. **(B-E)** Mean blood flow velocity **(B, D)** and mean linear  
22 velocity **(C, E)** of *narfl*<sup>-/-</sup> zebrafish were compared to wild-type zebrafish at different  
23 developmental stages. Significant differences were observed at specific time points. **(F)** The  
24 DCFH-DA probe was utilized to measure oxidative stress in 5 dpf zebrafish. Stronger green  
25 fluorescence indicated higher oxidative stress levels. Quantitative analysis showed enhanced  
26 fluorescence intensity in *narfl*<sup>-/-</sup> zebrafish compared to wild type. **(G)** The DPPP probe was used  
27 to detect lipid peroxidation levels in 5 dpf zebrafish. Stronger purple fluorescence indicated higher  
28 lipid peroxidation levels. **(H)** The BODIPY 493/503 probe detected neutral lipid levels in  
29 zebrafish, with stronger green fluorescence indicating higher lipid levels. **(I)** Iron levels in  
30 zebrafish were measured by a colorimetric method, showing significantly higher iron levels in  
31 *narfl*<sup>-/-</sup> zebrafish compared to wild type. Fe<sup>3+</sup> levels were also increased. **(J)** Cytoplasmic  
32 cisaconitase activity was assessed in zebrafish, with significantly enhanced activity observed in  
33 *narfl*<sup>-/-</sup> zebrafish. **(K)** Glutathione and glutamine levels in zebrafish were measured, revealing  
34 significantly reduced levels in *narfl*<sup>-/-</sup> zebrafish. **(L)** Mitochondrial respiration integration of  
35 wild-type and *narfl*<sup>-/-</sup> zebrafish demonstrated a decrease in mitochondrial respiratory function in  
36 *narfl*<sup>-/-</sup> zebrafish. **(M)** qRT-PCR was used to verify related genes of P450 family with differences  
37 in RNA sequencing, and the results showed that *cyp2p8*, *cyp3c3*, *cyp8b2* and *cyp2n13* were  
38 significantly decreased in *narfl*<sup>-/-</sup> zebrafish. *cyp2x7*, *cyp2k8* and *cyp2v1* were significantly  
39 increased, while there was no significant difference in other genes. **(N)** In situ hybridization  
40 detected *cyp2p8* expression in 5 dpf wild-type and *narfl*<sup>-/-</sup> zebrafish, as well as after treatment  
41 with the *cyp2p8*-specific activator ophiopogon D. The locations indicated by the black arrows  
42 showed the sites with positive *cyp2p8* probe signals **(O)** Immunohistochemistry was performed to  
43 analyze the expression of CYP2J2 in adjacent lung tissue and in progenitors with diffuse  
44 pulmonary malformation. CYP2J2 expression in the cytoplasm was reduced in progenitors with  
45 down-regulated NARFL expression.

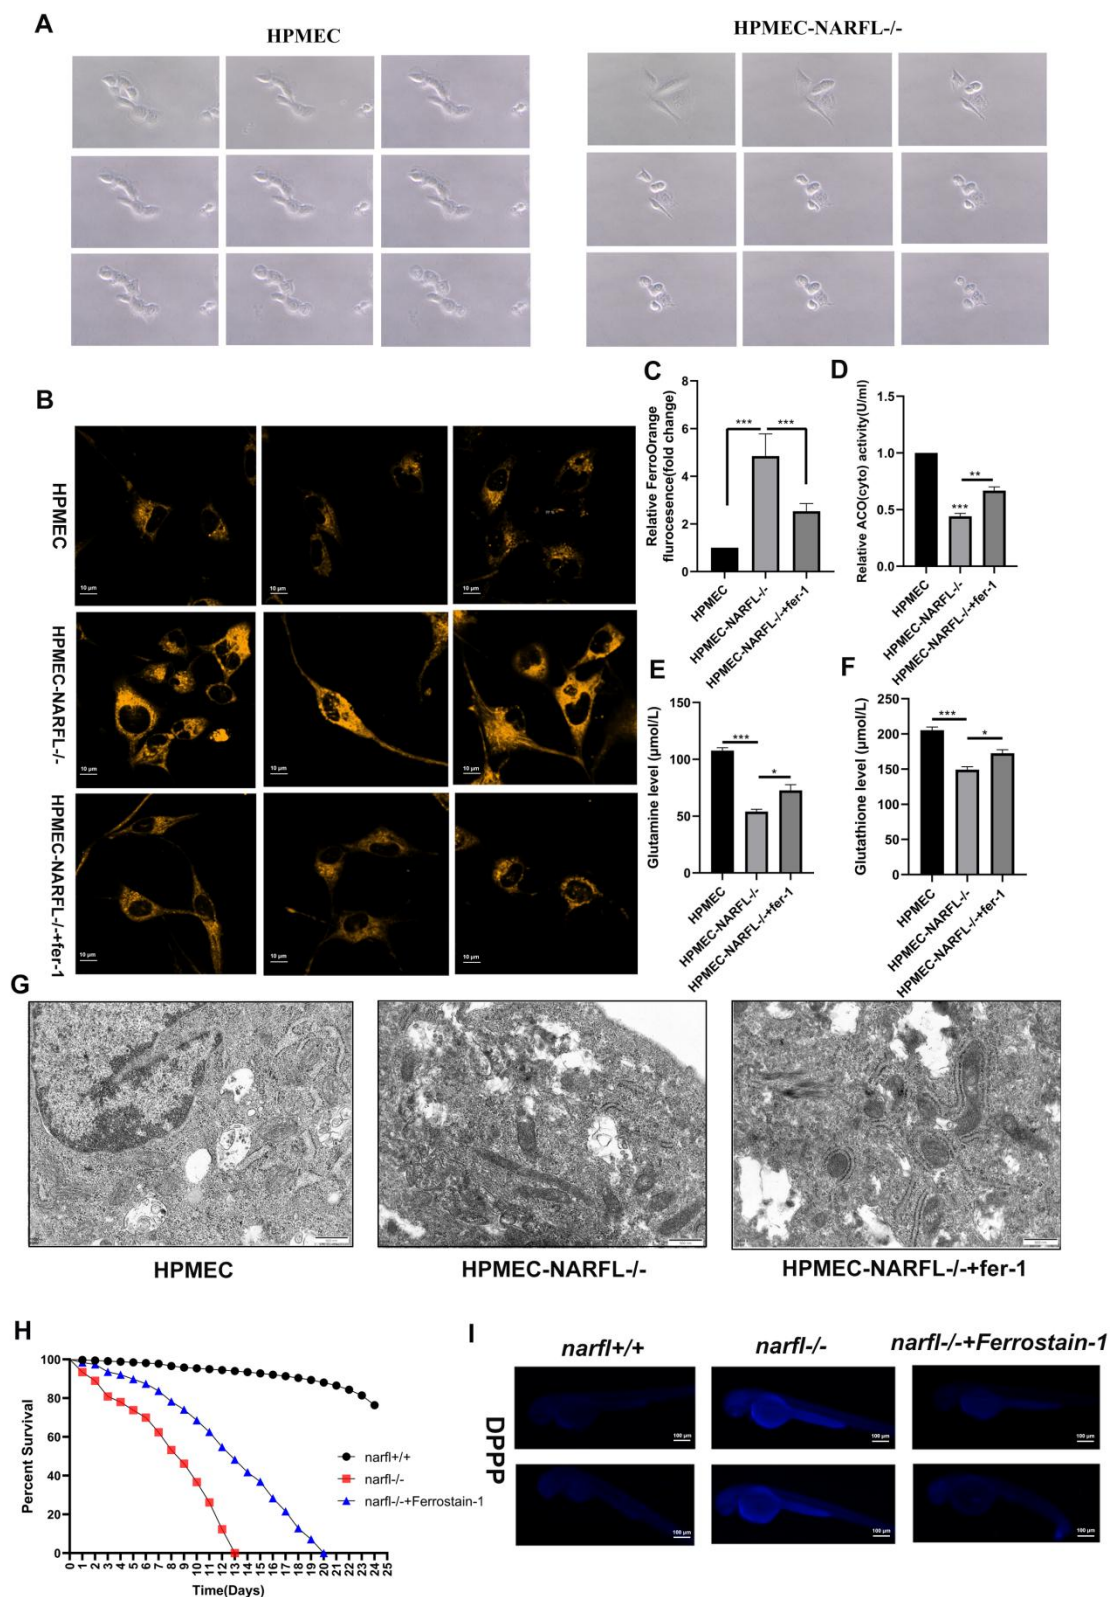

46

47 **Figure 3: Endothelial Knockdown of NARFL Promotes Ferroptosis and Alleviation of**  
 48 **Oxidative Stress Injury by Ferrostain-1. (A) Dynamic observation under a microscope and**  
 49 **daily photography of HPMEC wild-type cells and *NARFL* mutant cells revealed significant**

50 differences in cell death patterns. *NARFL* mutant cells exhibited noticeable morphological changes  
51 from long and narrow to round, resembling cells undergoing ferroptosis. **(B)** Confocal  
52 fluorescence microscopy with FerroOrange probe showed fluorescence intensity in HPMEC,  
53 *NARFL*<sup>-/-</sup> HPMEC, and *NARFL*<sup>-/-</sup> HPMEC cells treated with FerroStain-1 (6μM). Darker orange  
54 color indicated higher ferrous ion content in the cells. **(C)** Quantitative results of ferrous ion  
55 content measured by FerroOrange fluorescence probe showed a significant increase in HPMEC  
56 after *NARFL* deletion, which decreased after FerroStain-1 addition. **(D-F)** Quantitative results of  
57 cytoplasmic cisaconitase **(D)**, glutamine **(E)**, and glutathione **(F)** in HPMEC, *NARFL*<sup>-/-</sup> HPMEC,  
58 and 6μM FerroStain-1 treated *NARFL*<sup>-/-</sup> HPMEC cells illustrated decreased cytoplasmic  
59 cis-aconitase activity, intracellular glutathione, and glutamine content in endothelial cells after  
60 *NARFL* deletion. Partial restoration was observed upon treatment with the ferroptosis inhibitor  
61 FerroStain-1. **(G)** Transmission electron microscopy of *NARFL*<sup>-/-</sup> HPMEC revealed distinct  
62 morphological differences in mitochondria compared to wild-type cells, exhibiting smaller size,  
63 increased membrane density, and reduced cristae, consistent with ferroptosis morphology.

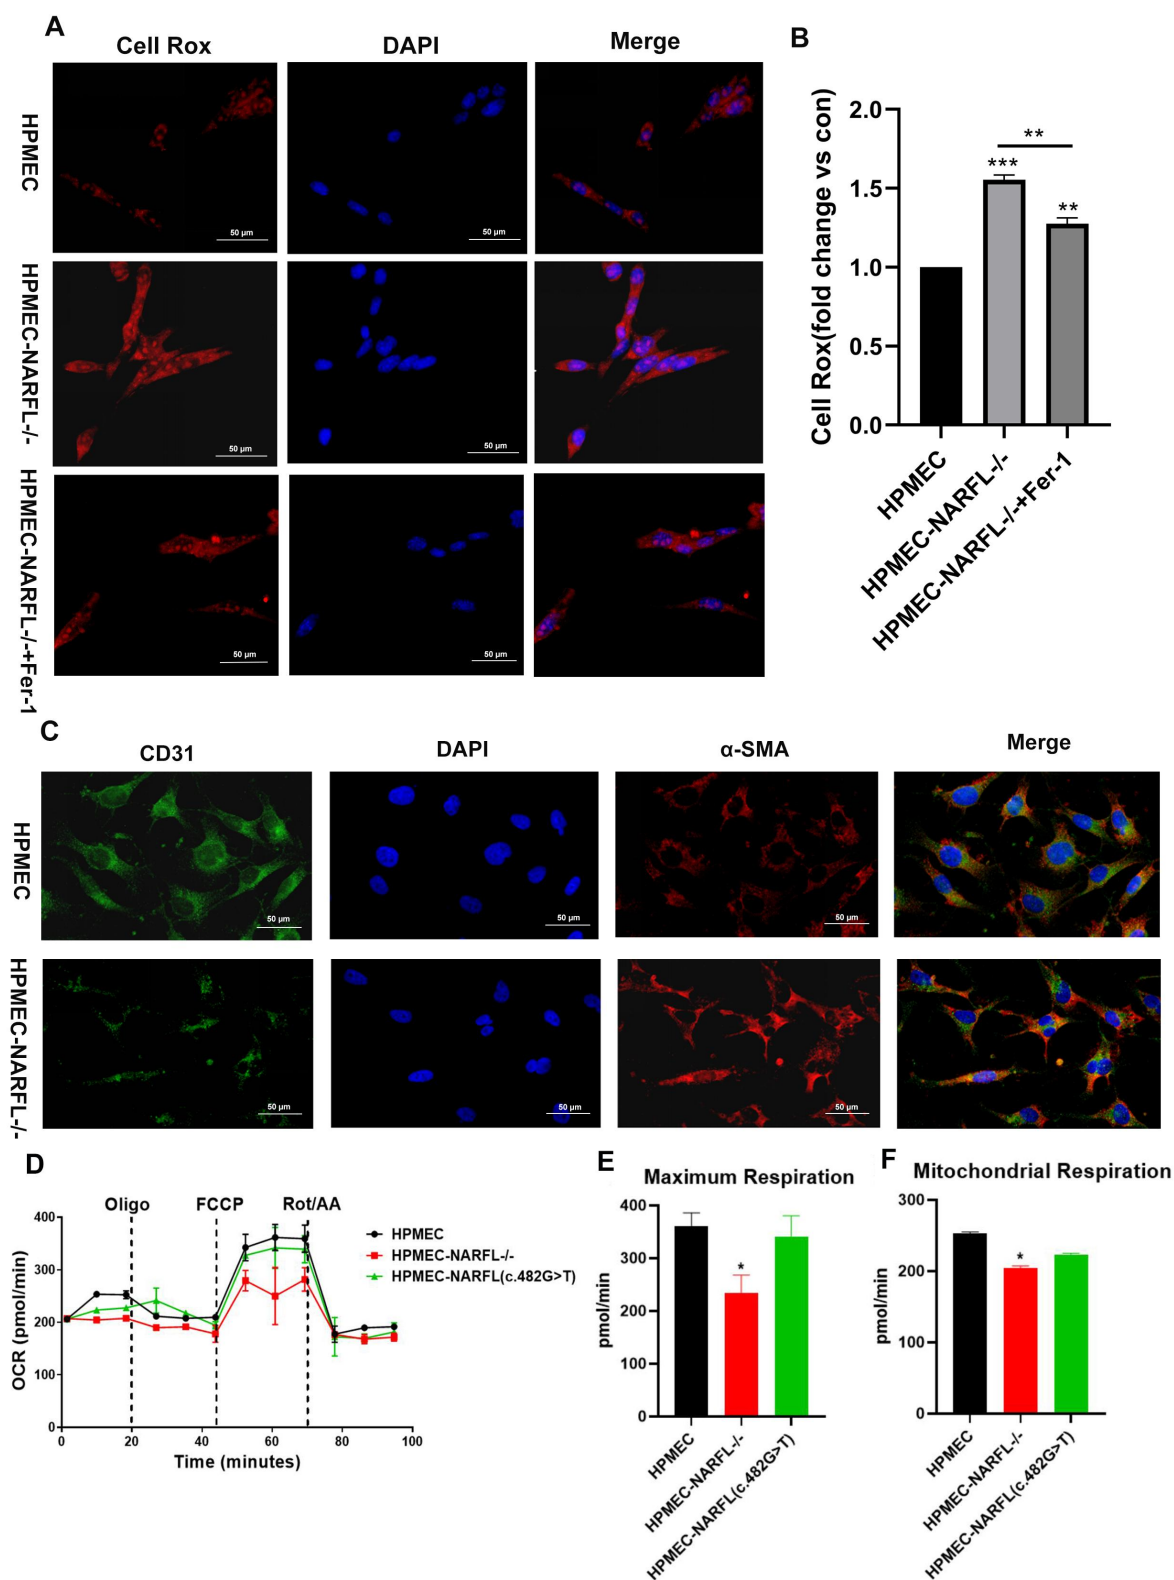

64

65 **Figure 4: NARFL Gene Deletion Leads to Endothelial Cell Dysfunction.** (A) Cell Rox kit was  
 66 utilized to assess the oxidative stress level of endothelial cells. The intensity of red fluorescence  
 67 indicates the level of cellular oxidative stress. (B) Quantitative analysis of cellular oxidative stress

68 using CellRox kit revealed that NARFL deletion increased the level of oxidative stress in  
69 endothelial cells. Treatment with the ferroptosis inhibitor Ferrostatin-1 partially alleviated the  
70 oxidative stress injury caused by NARFL gene deletion. **(C)** Immunofluorescence was performed  
71 to examine the expression levels of the endothelial cell marker CD31 and the fibroblast marker  
72  $\alpha$ -SMA in HPMEC and *NARFL*<sup>-/-</sup> HPMEC. Green fluorescence indicates CD31 expression, while  
73 red fluorescence indicates  $\alpha$ -SMA expression. The results demonstrated that NARFL gene deletion  
74 downregulated CD31 and upregulated  $\alpha$ -SMA expression. **(D-F)** Mitochondrial respiratory  
75 function curves of HPMEC, *NARFL*<sup>-/-</sup> HPMEC, and HPMEC transfected with *NARFL* (*c.482*  
76 *G>T*) were generated. The black curve represents the wild-type cells, the green curve represents  
77 *NARFL*-transfected cells with the *c.482 G>T* point mutation, and the red curve represents  
78 HPMEC with *NARFL* deletion mutations. The results showed that mitochondrial respiratory  
79 function decreased in the presence of the *NARFL* (*c.482 G>T*) point mutant, although the  
80 difference compared to wild-type cells was minimal. On the other hand, *NARFL* deletion resulted  
81 in a significant decrease in mitochondrial function. **(H)** Survival analysis showed that 8 $\mu$ M  
82 Ferrostatin-1 extended the survival time of *narfl*<sup>-/-</sup> zebrafish from 13 days to 21 days. **(I)** DPPP  
83 fluorescent probe-based detection of 5 dpf zebrafish treated with 8  $\mu$ M Ferrostatin-1 demonstrated  
84 inhibition of lipid peroxidation levels caused by *narfl* deletion.

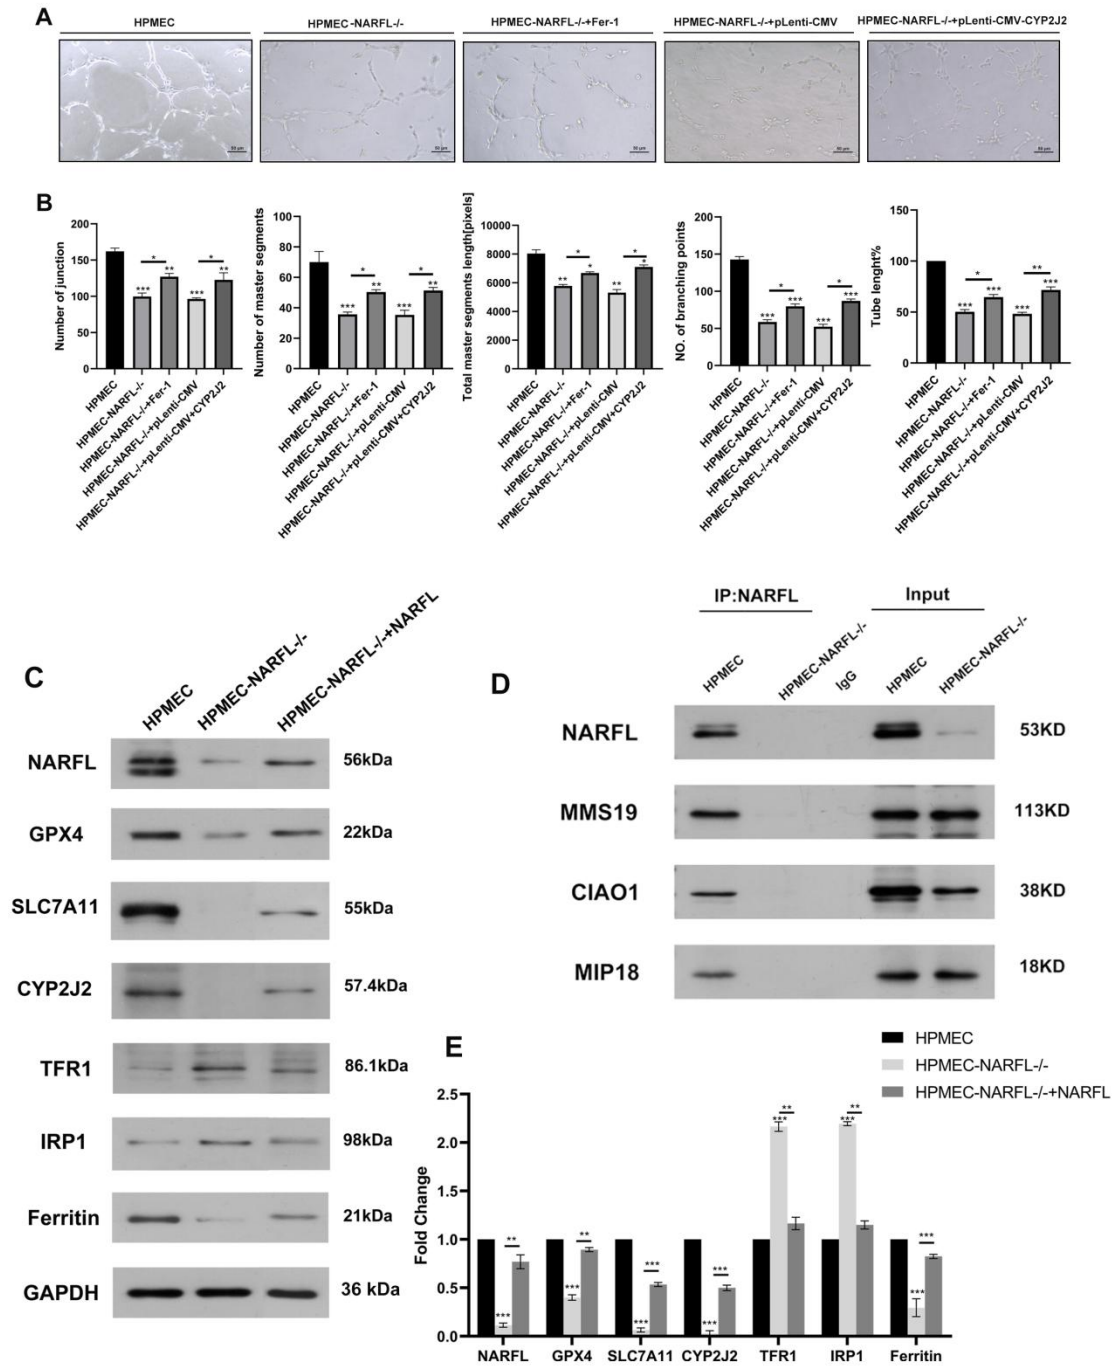

85

86 **Figure 5. NARFL Gene Deletion Leads to Endothelial Cell Dysfunction with Abnormal**  
 87 **Ferroptosis Pathway and Impaired Interaction with CIA System Related Proteins in**  
 88 **Endothelial Cells. (A-B) Tube formation experiment comparing HPMEC, *NARFL*<sup>-/-</sup> HPMEC,**  
 89 ***NARFL*<sup>-/-</sup> HPMEC treated with the Ferrostatin-1 inhibitor of ferroptosis, and *NARFL*<sup>-/-</sup> HPMEC**  
 90 **transfected with CYP2J2 plasmid. Results demonstrated the difficulty in tubular formation due to**  
 91 **NARFL deletion, with partial recovery observed with Ferrostatin-1 treatment and NARFL**  
 92 **overexpression through CYP2J2 plasmid transfection. (C) Western blot analysis of HPMEC**



93 wild-type cells, *NARFL*<sup>-/-</sup> HPMEC cells, and *NARFL*<sup>-/-</sup> HPMEC cells transfected with an  
 94 overexpression *NARFL* plasmid. The results showed downregulation of GPX4, SLC7A11, and  
 95 Ferritin expression along with upregulation of TFR1 and IRP1 in *NARFL*-deficient cells.  
 96 Additionally, CYP2J2 expression was negligible in *NARFL*<sup>-/-</sup> HPMEC, while transfection with  
 97 the overexpressed *NARFL* plasmid partially restored these changes. (D) Co-immunoprecipitation  
 98 analysis revealed that the *NARFL* mutant group failed to interact with MMS19, CIAO1, and  
 99 MIP18 proteins, highlighting impaired interaction with CIA system-related proteins due to *NARFL*  
 100 gene deletion.

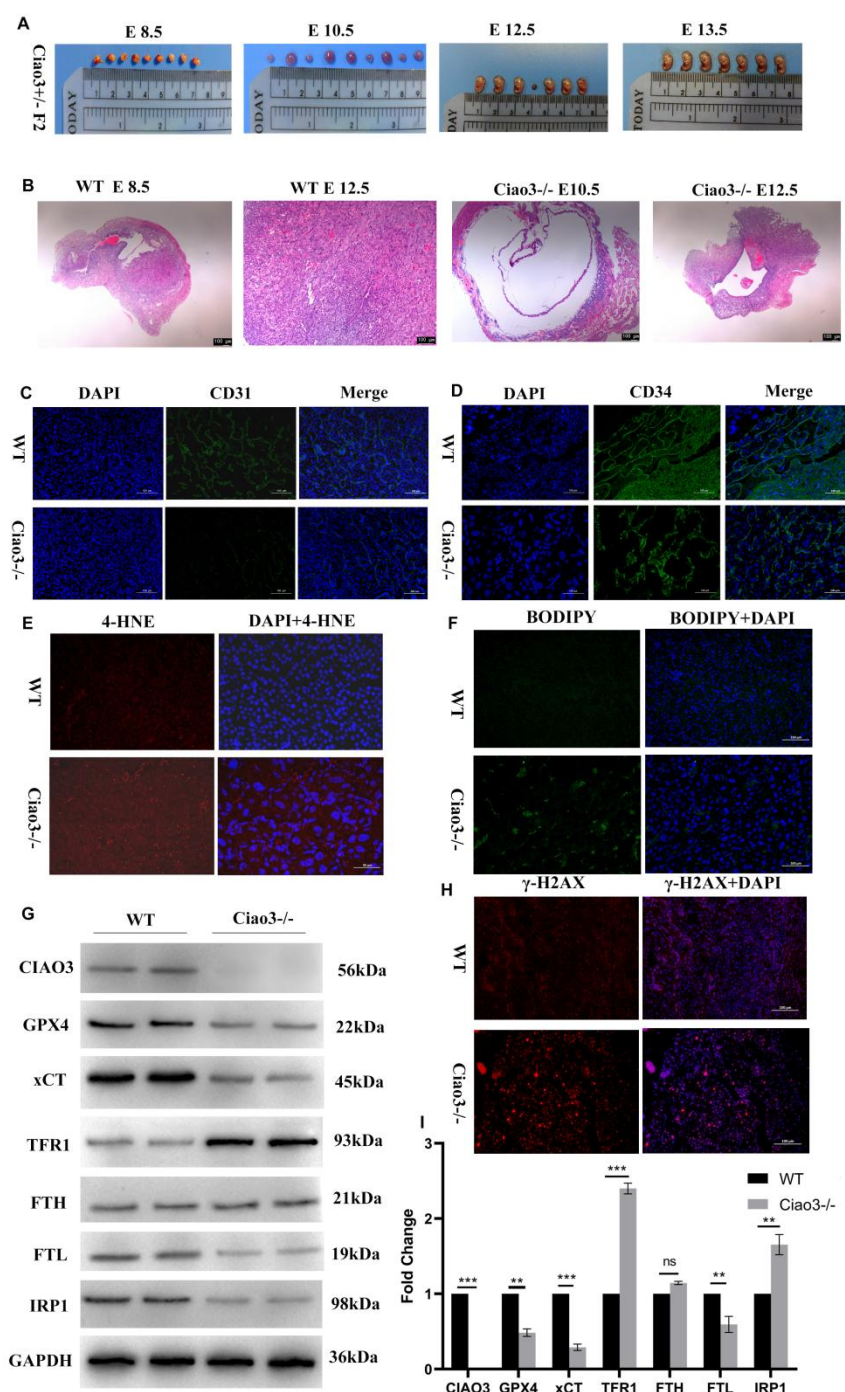

102 **Figure 6. Deletion of Ciao3 Gene Leads to Embryonic Death and Vascular Development**  
103 **Disorder in Mice.** (A) The morphological changes of Ciao3 heterozygous offspring at 8.5, 10.5,  
104 12.5, and 13.5 days of gestation. Ciao3 knockout mice embryos were still present at 12.5 days but  
105 completely absorbed at 13.5 days and beyond. (B) H&E staining of wild-type and Ciao3<sup>-/-</sup> mice  
106 embryos at 8.5 and 12.5 days. The development of Ciao3 knockout embryos was significantly  
107 delayed compared to wild-type embryos, with a blockade in vascular system development. (C)  
108 Immunofluorescence staining of the endothelial marker CD31 in 12.5-day mice embryos. (D)  
109 Immunofluorescence staining of the endothelial progenitor cell marker CD34 in 12.5-day mice  
110 embryos. (E-F) Detection of 4-HNE (E) and BODIPY (F) in 12.5-day mice embryos. The positive  
111 rate of 4-HNE and BODIPY staining was significantly higher in Ciao3<sup>-/-</sup> embryos compared to  
112 wild-type embryos. (G-I) Western blot analysis showing significant downregulation of GPX4,  
113 xCT, and FTL, and significant upregulation of TFR1 and IRP1 in Ciao3 knockout embryos  
114 compared to wild-type embryos. (H)  $\gamma$ -H2AX detection showed enhanced DNA damage in  
115 Ciao3<sup>-/-</sup> embryos compared to wild-type embryos.

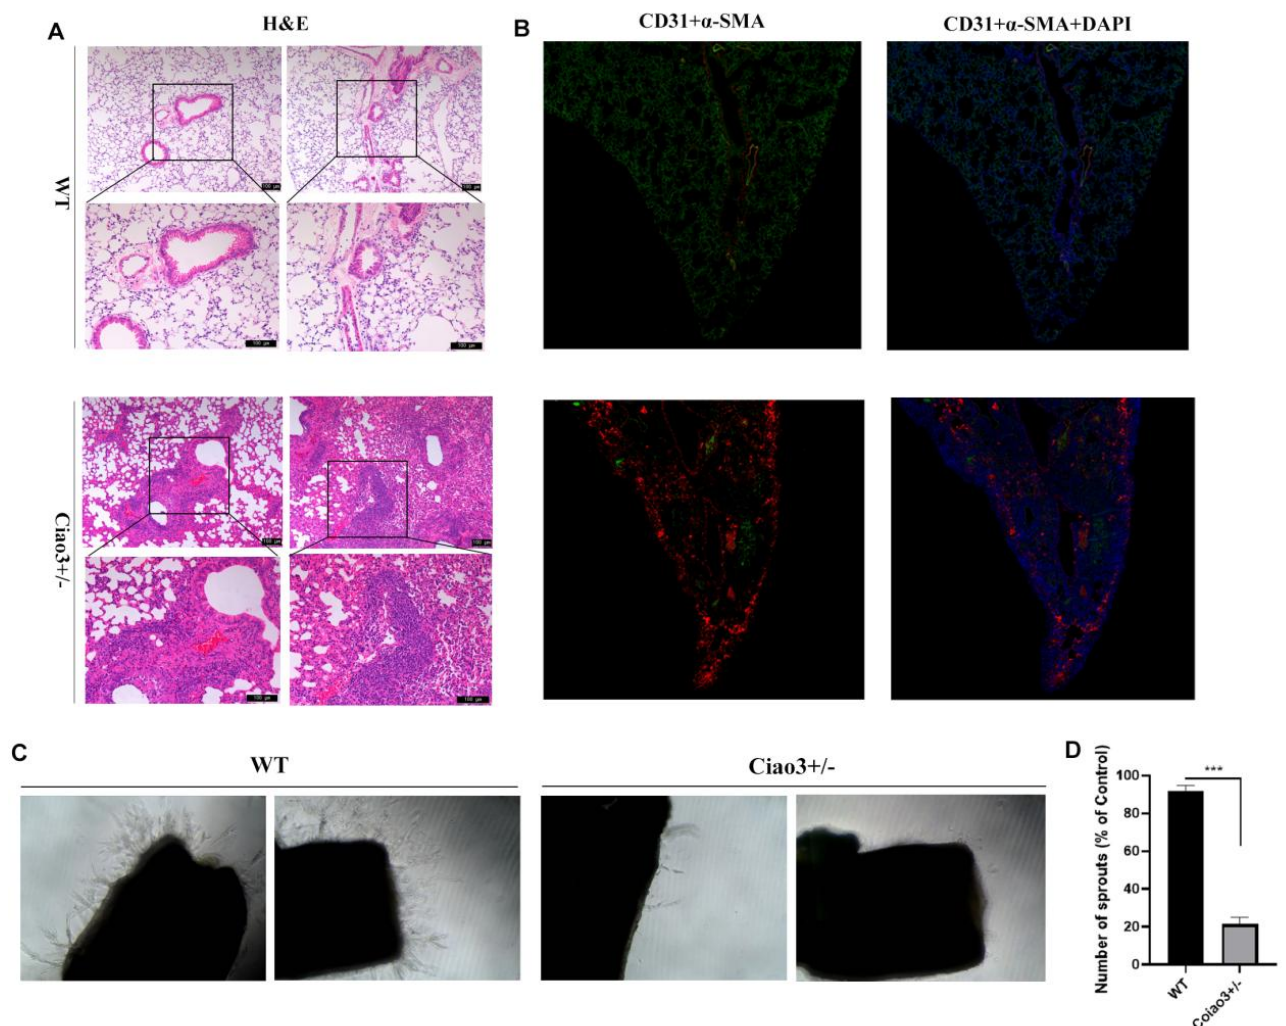

117 **Figure 7. Impairment of Vascular Function in Ciao3 Heterozygous Mice.** (A) H&E staining of  
118 lung sections from 9-week-old mice. The pulmonary artery walls and small blood vessels were  
119 significantly thicker in Ciao3<sup>+/-</sup> mice compared to wild-type mice. (B) Dual fluorescence  
120 immunostaining of CD31 and  $\alpha$ -SMA in lung sections of 9-week-old mice. CD31 expression was  
121 evenly distributed in the lung lobes of wild-type mice, with dense CD31-positive cells, while  
122  $\alpha$ -SMA expression was sparsely distributed. (C-D) Aortic rings embedded in matrix glue were  
123 cultured in ECM medium for 4 days. The number of sprouts in the aortic rings of Ciao3<sup>+/-</sup> mice  
124 was significantly reduced compared to wild-type mice.

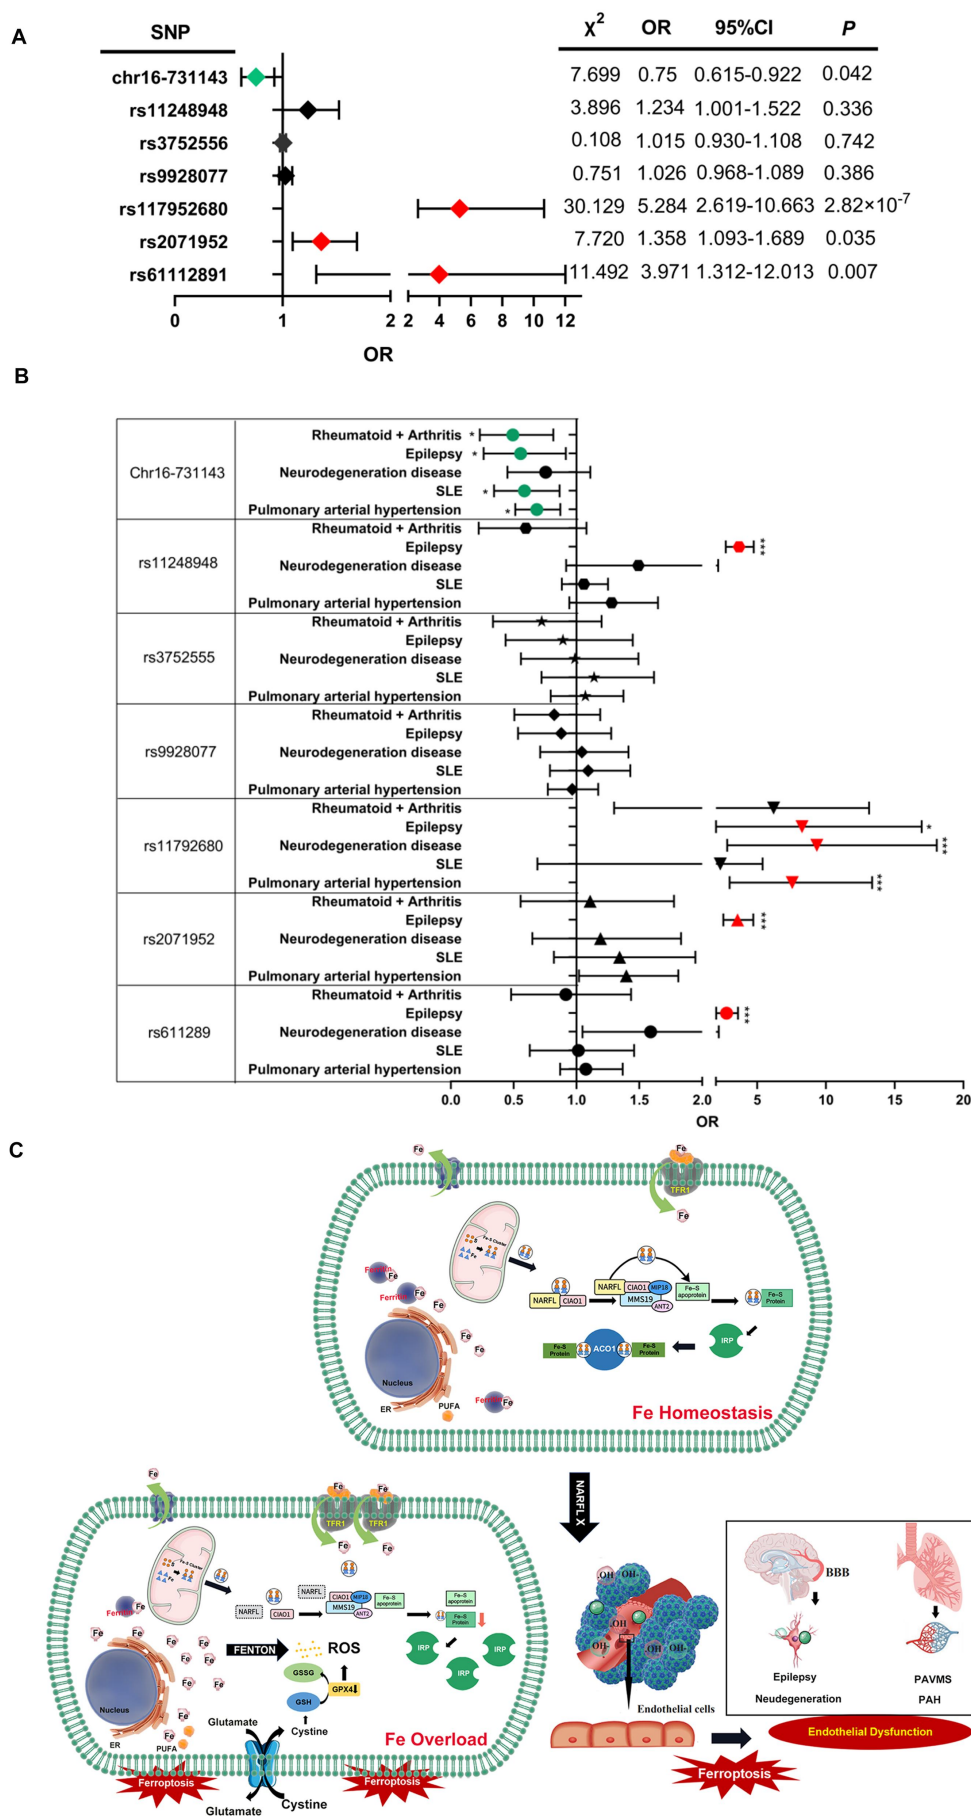

126 **Figure 8. NARFL Polymorphisms as Susceptible Sites of Vascular Endothelial Dysfunction**

127 **Diseases.** (A) Among the seven tagSNPs of NARFL (rs61112891, rs2071952, rs117952680,  
128 rs9928077, rs3752556, rs11248948, and chr-731143), the frequency distribution of four SNP  
129 genotypes (rs1179252680, rs2071952, rs61112891, and chr16-731143) showed statistically  
130 significant differences between cases and controls. The genotypes of rs1179252680 ( $p < 0.001$ ),  
131 rs61112891 ( $p < 0.01$ ), rs2071952 ( $p < 0.05$ ), and chr16-731143 ( $p < 0.05$ ). The odds ratio (OR)  
132 values of rs1179252680, rs2071952, and rs61112891 were greater than 1, while the OR values of  
133 chr16-731143 were less than 1. (B) The genotype frequency distribution was further analyzed  
134 between the seven tagSNPs and patients with various vascular endothelial dysfunction-related  
135 diseases, including pulmonary hypertension, neurodegenerative diseases, epilepsy, systemic lupus  
136 erythematosus, rheumatoid arthritis, and arteritis. (C) Mechanism Summary Diagram: under  
137 normal circumstances, NARFL facilitates the transfer of iron-sulfur clusters (ISC) synthesized in  
138 mitochondria to the cytosolic iron chaperone (CTC), composed of CIAO1, MIP18, and MMS19,  
139 through the interaction with CIAO1. This transfer of ISC allows for the incorporation of the ISC  
140 into specific apo-proteins, forming mature ferritin and maintaining intracellular iron homeostasis.  
141 However, in the absence of NARFL, the transfer of ISC from mitochondria to CTC is hindered,  
142 leading to the failure in the formation of mature ferritin. Consequently, iron-responsive protein 1  
143 (IRP1) increases the expression of transferrin receptor 1 (TFR1), promoting iron uptake, while  
144 inhibiting the expression of ferritin, inhibiting iron storage. As a result, intracellular iron levels  
145 increase, triggering enhanced oxidative stress through the Fenton reaction. Concurrently, the  
146 downregulation of SCL7A11 and GPX4 reduces the synthesis of cytoplasmic glutathione and  
147 glutamine, exacerbating reactive oxygen species production. This oxidative stress activates lipid  
148 peroxidation, inducing ferroptosis and vascular endothelial cell death, ultimately leading to  
149 vascular endothelial dysfunction.

150  
151  
152  
153  
154  
155  
156  
157  
158  
159

## SUPPLEMENTAL MATERIAL

### The Mechanism of Vascular Endothelial Dysfunction

### Induced by Ferroptosis Mediated by NARFL Knockout

#### Supplemental Methods

##### Zebrafish and behavioral analysis

The zebrafish culture and experimental procedures were conducted in accordance with the guidelines specified in the zebrafish handbook and regulations on the Care and use of Laboratory Animals. These protocols were approved by the Institute of Hydrobiology, Chinese Academy of Sciences (Approval ID: IHB 2013724). The wild type zebrafish used in the study were maintained under standard conditions<sup>1</sup>. Zebrafish developmental stages were determined based on hour post-fertilization (hpf) or days post-fertilization (dpf)<sup>2</sup>.

Homozygous *flk:GFP/narfl*<sup>-/-</sup> zebrafish lines were generated through mating of *flk:GFP/narfl*<sup>+/-</sup> adult fish, obtained by hybridizing *flk:GFP/Con* and *narfl*<sup>+/-</sup> fish. For behavioral analysis, 7 dpf zebrafish were individually placed in a 24-hole plate. The plate was then positioned in a behavior analysis system equipped with Viewpoint zebrafish tracking software (ViewPoint Life Sciences, Zebraool, Lyon, France). The detection area, along with parameters including time (60 min), background pixels (18-24 pixels), speed (0.4-10 mm/s), output interval time (60 s), and photocycle intensity (500 lx), were adjusted.

To ensure sufficient data for zebrafish of different genotypes, a total of 10 groups of experiments were conducted. The behavior of 240 zebrafish was monitored, and their track maps were recorded and analyzed using ViewPoint's Micro Zebra Lab. This software utilizes high-speed video recordings of zebrafish to measure various parameters such as pulse rate, blood flow, and changes in vessel diameter. The blood flow data were calculated using the software algorithm, which analyzes the correlation between consecutive frames. Zebrafish aged 3-13 dpf were placed on a microscope slide for observation. The video file of the zebrafish sample was opened on a computer, and the microscope slide with the zebrafish was positioned in the designated observation area. A 1-minute analysis was conducted once the settings were verified. The original measured data is represented in red, while the results obtained after filtering with the fast Fourier Transform algorithm (FFT) are represented in blue.

##### Blood vessels and blood-brain barrier imaging in zebrafish

Confocal microscopy images of 3dpf *flk:GFP/narfl*<sup>-/-</sup> homozygous embryos were acquired

192 using a Zeiss ISM 710 confocal microscope. The images captured the blood-brain barrier (BBB),  
193 Dorsal longitudinal aorta vessels (DLAV), Dorsal aorta (DA), Posterior cardinal vein (PCV),  
194 connector cells, and basal cells. The percentage of total DLAV, junction cells, and basal cells was  
195 calculated as previously described<sup>3</sup>.

196 The ultrastructure of the blood-brain barrier in zebrafish was observed using transmission  
197 electron microscopy. 7 dpf zebrafish with different genotypes were fixed, dehydrated, made  
198 transparent, embedded in wax, sectioned (thickness of 6  $\mu$ m), stained with toluidine blue, and  
199 examined for Nissl bodies under a microscope. Additionally, a Prussian blue staining solution was  
200 prepared by mixing hydrochloric acid and potassium ferricyanide in a 1:1 ratio. Prussian blue  
201 staining was performed using the same method mentioned above to observe the presence of  
202 positively stained Prussian blue complexes.

203

#### 204 **Whole-mount RNA in situ hybridization (WISH) and quantitative real time PCR**

205 The primers used were as follows: Forward primer: 5'-AGGAAACATCCGTCA TGGACT-3'  
206 and Reverse primer: 5'-TAATACGACTCACTATAGGG(T7)ATGGCTTAGGACAGTGTGTGC-  
207 3'. WISH was performed according to previously described methods<sup>4-6</sup>. Total RNA was extracted  
208 from the embryos at different developmental stages using the Trizol reagent (Invitrogen, Carlsbad,  
209 CA, USA), and quantitative real-time PCR was conducted as previously described<sup>7</sup>. The data were  
210 analyzed using the  $\Delta\Delta$ Ct method, with  $\beta$ -actin used as the house-keeping gene. All experiments  
211 were performed in triplicate, and the primer sequences are listed in **Supplementary Table S4**.

212

#### 213 **Construction of a stable cell line with *NARFL* gene knockout was performed in HPMEC** 214 **cells.**

215 Two protein-encoding variants of the *NARFL* gene were identified from NCBI and Ensemble  
216 databases, consisting of 476 and 374 amino acid sequences. The shared exon region of both  
217 variants was selected for the design of screening sgRNAs. The location and sequence of the  
218 sgRNAs are provided in **Figure 4A in the online-only Data Supplement**.

219 Wild-type HPMEC cells were collected, and genomic DNA was extracted using the  
220 TIANamp Genomic DNA Kit. The *NARFL* target gene was amplified using 2 $\times$ EasyTaq PCR  
221 SuperMix. Five confirmed sgRNAs were used for the construction of sgRNA-Cas9 plasmids.  
222 HEK293 cells were cultured and used for virus packaging. After 96 hours, the lentivirus was  
223 collected, filtered, and used for cell infection. Genomic PCR amplification was performed to  
224 confirm the cleavage effect of the corresponding sgRNAs. The verified cells were then subjected  
225 to monoclonal cell selection by seeding one cell per well in a 96-well plate. After two weeks,  
226 monoclonal cell communities were selected and expanded into larger plates.

227 Genomic DNA was extracted from the expanded monoclonal cell lines, and target  
228 amplification was performed followed by sequencing to confirm successful gene editing and  
229 obtain *NARFL* gene knockout cells. Among the 109 selected monoclonal cells, only four  
230 (HPMEC-*NARFL*-sg6-10, 20, 26, 40) showed functional knockout of single alleles. However,  
231 HPMEC-*NARFL*-sg6-10 exhibited cell death during the growth process and was deemed  
232 unsuitable for further experiments. Therefore, HPMEC-*NARFL*-sg6-20, 26, and 40 were selected  
233 for additional verification using Western blot analysis. The results showed that HPMEC-*NARFL*  
234 -sg6-40 exhibited the most significant decrease in *NARFL* expression compared to wild-type cells.

235 Consequently, HPMEC-*NARFL*-sg6-40 was selected as the final knockout cell line for  
236 subsequent experiments, as depicted in **Figure 4D in the online-only Data Supplement**.

237

### 238 **Ferroptosis Related Indicators Assay**

239 Genomic DNA isolation and genotyping were performed using the NaOH lysis method as  
240 previously described<sup>8</sup>. Caudal fins of zebrafish embryos were cut, and the DNA from the tail  
241 samples was used for genotyping. The remaining body of the zebrafish embryos was sampled for  
242 reactive oxygen species (ROS) assay.

243 In brief, the embryos were digested with 100  $\mu$ L of 0.25% (w/v) trypsin/EDTA solution for  
244 10 minutes. The reaction was stopped by adding 200  $\mu$ L of DMEM containing 10% (v/v) fetal  
245 bovine serum (FBS). The sample was then centrifuged at 2500 rpm for 5 minutes at 4°C to remove  
246 the supernatant. The cell pellet was washed with 200  $\mu$ L of PBS containing 2% (v/v) FBS,  
247 followed by another centrifugation step. The cells were resuspended in 200  $\mu$ L of PBS containing  
248 2% FBS and incubated at 37°C for 30 minutes with 10  $\mu$ M DCFH-DA, BODIPY 493/503 probe,  
249 and DPPP probe (Maokang, Shanghai, China). A sample without probe incubation was used as a  
250 negative control. The fluorescence was detected using a FACS Canto Flow Cytometer (BD  
251 Bioscience, USA) at the excitation/emission wavelengths of 488/525 nm and 351/380 nm.

252 For the assay using 5 dpf zebrafish embryos cultured at 1 $\times$ PTU, the embryos were collected  
253 and placed in a 24-well cell culture plate with new egg water. A 1  $\mu$ L solution of BES-H<sub>2</sub>O<sub>2</sub>-AC  
254 fluorescent dye (1 mg/L, soluble in DMSO), BODIPY 493/503, and DPPP was added to each well  
255 with a dilution of 1:10000. The dye solution was gently shaken to disperse it. The plate was then  
256 incubated in a 28°C incubator for 2 hours and subsequently observed under a fluorescence  
257 microscope.

258 To inhibit ferroptosis, a 16  $\mu$ M concentration of Ferrostatin-1 (MedChemExpress, LLC, USA)  
259 was used for ferroptosis inhibition exposure starting from 24 hpf. After two days of treatment, 3  
260 dpf embryos were collected for ferroptosis measurement.



## 261 **Cell Counting Kit-8 (CCK-8) Cell Proliferation Experiments**

262 Cell proliferation experiments were conducted using the Cell Counting Kit-8 (CCK-8) assay,  
263 which utilizes a water-soluble tetrazolium salt, WST-8 (2-(2-methoxy -4-nitrophenyl)-3-(4-nitro  
264 phenyl)-5-(2,4-disulfophenyl)-2H-tetrazolium monosodium salt) developed by Dojindo. The  
265 WST-8 is reduced by intracellular dehydrogenases in the presence of the electron carrier  
266 1-Methoxy PMS, resulting in the formation of an orange-yellow formazan dye. The amount of  
267 formazan dye produced is directly proportional to the number of viable cells and can be measured  
268 spectrophotometrically.

269

## 270 **Biochemical Analyses**

271 Cytosolic aconitase activity was assessed using the Aconitase Activity Assay Kit  
272 (Sigma-Aldrich, St. Louis, MO, USA). The levels of cellular redox substances, including  
273 glutathione (GSH), glutamine, and malondialdehyde (MDA), were measured using colorimetric  
274 assays with commercially available assay kits (Beyotime, Nanjing, China). The iron level in  
275 zebrafish was determined using a colorimetric assay kit (Dojindo laboratories, Kumamoto, Japan).  
276 Vascular endothelial function, including nitric oxide (NO) and endothelin-1 (ET-1), was measured  
277 using ELISA assays with commercially available assay kits (LMAI, Shanghai, China).

278

## 279 **Seahorse Assay**

280 In 5-day-old zebrafish and HPMEC cells (20,000 cells/well), the oxygen consumption rate  
281 and extracellular acidification rate (a surrogate marker of glycolysis) were measured using an  
282 XFe24 Extracellular Flux Analyzer (Seahorse Biosciences). Sequential addition of 1  $\mu$ M  
283 Oligomycin, 0.5  $\mu$ M FCCP, and 2  $\mu$ M Rotenone plus 0.5  $\mu$ M Antimycin was performed, as  
284 previously described<sup>9</sup>.

285

## 286 ***In vitro* Angiogenesis Assays**

287 Tube formation was evaluated using a commercial kit, *In vitro* Angiogenesis Assay Kit  
288 (Chemicon International, Temecula, USA). Matrigel with reduced growth factors (100  $\mu$ l/well)  
289 was pipetted into a pre-chilled 48-well plate and polymerized at 37°C for 30 min. HPMECs and  
290 HPMEC-*NARFL*<sup>-/-</sup> cells treated differently (2  $\times$  10<sup>5</sup> cells/well) were suspended in 100  $\mu$ l of basic  
291 media and seeded onto the Matrigel-coated plate. After incubation for 4-6 hours, tubular structures  
292 were photographed using an Olympus microscope at 20 $\times$  magnification. The acquired images  
293 were then analyzed using the angiogenesis analysis plugin in Image J software for node count,  
294 intersection count, mesh number, mesh area, vascular branch count, total vascular length, vascular

295 branch length, and trunk length. The number of branch points was determined by quantifying  
296 triplicate determinations from three separate experiments.

297

### 298 **The Ciao3<sup>+/-</sup> mouse model was generated using the CRISPR/Cas9 method**

299 A Ciao3 (NARFL homologous) hybrid was constructed in C57BL/6 mice, and the mouse  
300 model was successfully knocked out. The Ciao3 gene motif (NCBI: NM\_026233.8; Chromosome  
301 17 Ensembl: ENSMUSG000 00002280) in mice consists of a total of 11 exons (transcript  
302 Ciao3-201: ENSMUST0 0000002350), with exons 3-4 selected as the knockout target. Exon 3  
303 starts from approximately 11.41% of the coding region, and exons 3-4 account for 19.4% of the  
304 coding region, resulting in an effective knockout region size of 1820 bp. A combination of Cas9  
305 and guide RNA (gRNA) was injected into fertilized eggs, resulting in targeted knockout of the  
306 offspring. The resulting F0 generation was screened using PCR, and wild-type mice were bred to  
307 confirm germline transmission and produce F1 offspring. Heterozygous mice were then mated to  
308 generate homozygous generations. Gene identification was performed using the following primer  
309 sequences: Primer 1: F1: 5'-CTGGCTCAGACCATTCTGCATC-3'; R1: 5'-GTGATGCTGCCA  
310 AACACTCGTCA-3'. The wild-type fragment size was 2509 bp, and the mutant fragment size was  
311 683 bp. Primer 2: F1: 5'-CTGGCTCAGACCATTCTGCATC-3'; R1: 5'-TTTTCTATTTCTGA  
312 CAGTA GGTGG-3'. The wild-type fragment size was 523 bp, and the heterozygous fragments  
313 were identified as follows: a fragment size of 683 bp with primer 1, and a fragment size of 523 bp  
314 with primer 2.

315

### 316 **Immunoblotting and Co-IP**

317 For immunoblotting, cells were lysed in Laemmli buffer, and the protein lysates were  
318 resolved by SDS-PAGE and transferred onto a PVDF membrane. The membranes were then  
319 blocked in 5% non-fat milk or BSA in PBS buffer with 0.1% Tween (PBST) and incubated  
320 overnight at 4 °C with primary antibodies. After washing with PBST buffer, the membranes were  
321 incubated with secondary antibodies for 1 hour at room temperature. Immunoreactive bands were  
322 visualized using the enhanced chemiluminescence (ECL) system.

323 The primary antibodies used were: NARFL (NOVUS, 1:1000), GPX4 (NOVUS, 1:1000),  
324 TFR (PK17158, 1:500), Ferritin (T55648, 1:1000), IRP1 (T55075, 1:1000) from Abmart,  
325 SLC7A11 (A2413, 1:2000) from CST, CYP2J2 (ATA27790, 1:2000) from Atagenix, NARFL  
326 (sc-514078, 1:500), MMS19 (sc-390028, 1:500), FAM96B (sc-376801, 1:5000), and CIAO1  
327 (sc-374498, 1:500) from Santa, and GAPDH (ab8245, 1/6000) from Abcam.

328 For the mouse embryo, fine fragments were obtained and lysed at a ratio of 200 µL per 20

329 mg of tissue. The lysate was homogenized and then centrifuged at 4 °C at 12000g for 15 minutes.  
330 The supernatant was collected, and the rest of the procedure was the same as for the cells.

331 For Co-IP, Protein A/G microspheres were washed with PBS and prepared as a 50% Protein  
332 A/G working solution. About 1 µg of IgG of the same species as the IP monoclonal antibody and  
333 100 µL of Protein A/G working solution were added to 1 mL of cleavage solution. The mixture  
334 was incubated at room temperature for 1 hour and then centrifuged at 13,000 g for 10 minutes.  
335 The supernatant was transferred to a new centrifuge tube to remove non-specific binding of  
336 proteins to immunoglobulins. Then, a specific volume of antiprecipitation antigen was added, and  
337 100 µL of Protein A/G working solution was added to capture the antigen-antibody complex. The  
338 mixture was incubated overnight at 4 °C with agitation. After centrifugation, the precipitation was  
339 collected and washed with pre-cooled PBS three times. The supernatant was removed by  
340 centrifugation, and the precipitation was retained. The precipitation was re-suspended in 100 µL of  
341 1× loading buffer and boiled in water at 100 °C for 5 minutes. Before loading, all samples were  
342 centrifuged at 4 °C at 13,000 g for 10 minutes, and the samples were loaded at 20 µL per well.

343

#### 344 **Immunohistochemistry and Immunofluorescence of Lung and Mouse Embryo Sections**

345 Cryostat sections were prepared from 5 µm thick OCT-embedded lung tissues and mounted  
346 on gelatin-coated histological slides. The slides were left to thaw at room temperature for 20  
347 minutes and then rehydrated in wash buffer for 10 minutes. All sections were blocked using 10%  
348 goat serum and incubated with primary antibodies overnight at 4°C, followed by incubation with  
349 Alexa 488, CY3, and CY5-conjugated secondary antibodies (Thermo Fisher Scientific) for  
350 immunofluorescence. Primary antibodies against NARFL (NBP1-83611, 1:200) and CD31  
351 (ab182981, 1:100) were obtained from Novus Biologicals and Abcam, respectively. Primary  
352 antibodies against α-SMA (BM0002, 1:100) and CYP2J2 (ATA27790, 1:500) were purchased  
353 from Boster Biological Technology and Atagenix, respectively. Primary antibodies against  
354 Endomucin (GB112648, 1:300), CD34 (GB13584, 1:200), γH2AX (GB111841, 1:200), CD31  
355 (GB113151, 1:200), and SMA (GB13044, 1:1000) were obtained from Servicebio. Imaging was  
356 performed using a Leica confocal microscope (TCS SP8). Small pulmonary vessels (<100 µm  
357 diameter) without association with bronchial airways were selected for analysis in each tissue  
358 section (>10 vessels/section). The intensity of staining was quantified using ImageJ software  
359 (NIH). The degree of pulmonary arteriolar muscularization was evaluated in OCT lung sections  
360 stained for α-SMA by calculating the proportion of fully and partially muscularized peripheral  
361 (<100 µm diameter) pulmonary arterioles, as described previously<sup>10</sup>. CD31, an endothelial cell  
362 marker, and CD34, an endothelial progenitor cell marker, were used for immunofluorescence

363 detection of whole embryos, and DNA damage in the embryos was assessed by  $\gamma$ -H2AX detection.

364

### 365 ***Ex vivo* Mice Aortic Ring Assay**

366 The subpackaged matrix glue was thawed at 4 °C, and 100  $\mu$ L of the glue was spread in each  
367 well of a 48-well cell culture plate. The plate was then incubated in a 37 °C incubator for 30  
368 minutes to allow the matrix glue to solidify. Three multiple holes were created in each well. Under  
369 sterile conditions and after ether anesthesia, aortas were extracted from both wild-type and  
370 Ciao3+/- mice. Para-aortic fat and other tissues were carefully removed, and the aortas were  
371 divided into rings approximately 1mm wide. These aortic rings were placed on top of the  
372 solidified matrix glue. An additional 100  $\mu$ L of melted matrix glue was added to cover the aortic  
373 rings, and the culture plate was incubated in a 37 °C incubator for 30 minutes. Then, 200  $\mu$ L of  
374 ECM medium containing 5% FBS was added, and the cultures were maintained for 4 days. After  
375 the incubation period, images were captured under a microscope, and the acquired images were  
376 analyzed using the angiogenesis analysis plug-in in ImageJ. The analysis included quantification  
377 of the number of blood vessel branches, total length of blood vessels, and length of blood vessel  
378 branches.

379

### 380 **The NARFL gene's tagSNPs were detected using the SNaPshot method**

381 Initially, the NCBI website ([NCBI.nlm.nih.gov](http://ncbi.nlm.nih.gov)) was accessed and a search for the "NARFL"  
382 gene was conducted, focusing on the Homo sapiens results. The position of the *NARFL* gene,  
383 79765-79099, was identified. The VCFtoPed tool was then utilized to acquire variation data for  
384 this gene in the Chinese population from the Homo sapiens section of the Ensembl database  
385 ([http://grch37.ensembl.org/Homo\\_sapiens/](http://grch37.ensembl.org/Homo_sapiens/)). Mutagenesis was conducted using the Haploview 4.2  
386 software, with the linkage format being selected. Following data importation, the marker check  
387 interface appeared, where parameters such as the Haploview balance cutoff value and MAF  
388 (Minor allele frequency) cutoff value were set. Upon filtering and selecting functional SNPs, the  
389 Tagger function was employed to screen the markers based on the selected SNPs, using an  $r^2$   
390 threshold of 0.8. The outcome of this screening resulted in the selection of 49 TagSNPs. For  
391 reference, the Ensembl database was accessed again ([http://grch37.ensembl.org/Homo\\_sapiens/Gene/VariationGene/Tabledb=core;g=ENSG00000103245;r=16:779753-791329](http://grch37.ensembl.org/Homo_sapiens/Gene/VariationGene/Tabledb=core;g=ENSG00000103245;r=16:779753-791329)), and 49  
392 TagSNPs were further shortlisted based on mutation type and 10 case-control preliminary  
393 experiments. Finally, seven TagSNPs (rs61112891, rs2071952, rs117952680, rs9928077,  
394 rs3752556, rs11248948, and chr-731143) were chosen for further analysis using large sample sizes.  
395 The SNP detection utilized the SNaPshot method, which follows the dideoxy termination principle  
396

397 of direct DNA sequencing. However, only fluorescently labeled ddNTPs corresponding to specific  
398 SNPs were used. By designing sequencing primers in close proximity to the SNP site, multiple  
399 SNP sites can be detected simultaneously. This involves DNA extraction, sample sorting, DNA  
400 detection, primer synthesis, PCR amplification, alkaline phosphatase treatment in a PCR station,  
401 and sequencing using an ABI 3730 XL sequencer.

402

403

404

405

406

407

408

409

410

411

412

413

414

415

416

417

418

419

420

421

422

423

424

425

426

427

428

429

430

431  
432  
433

## Supplemental Figures and Figure Legends

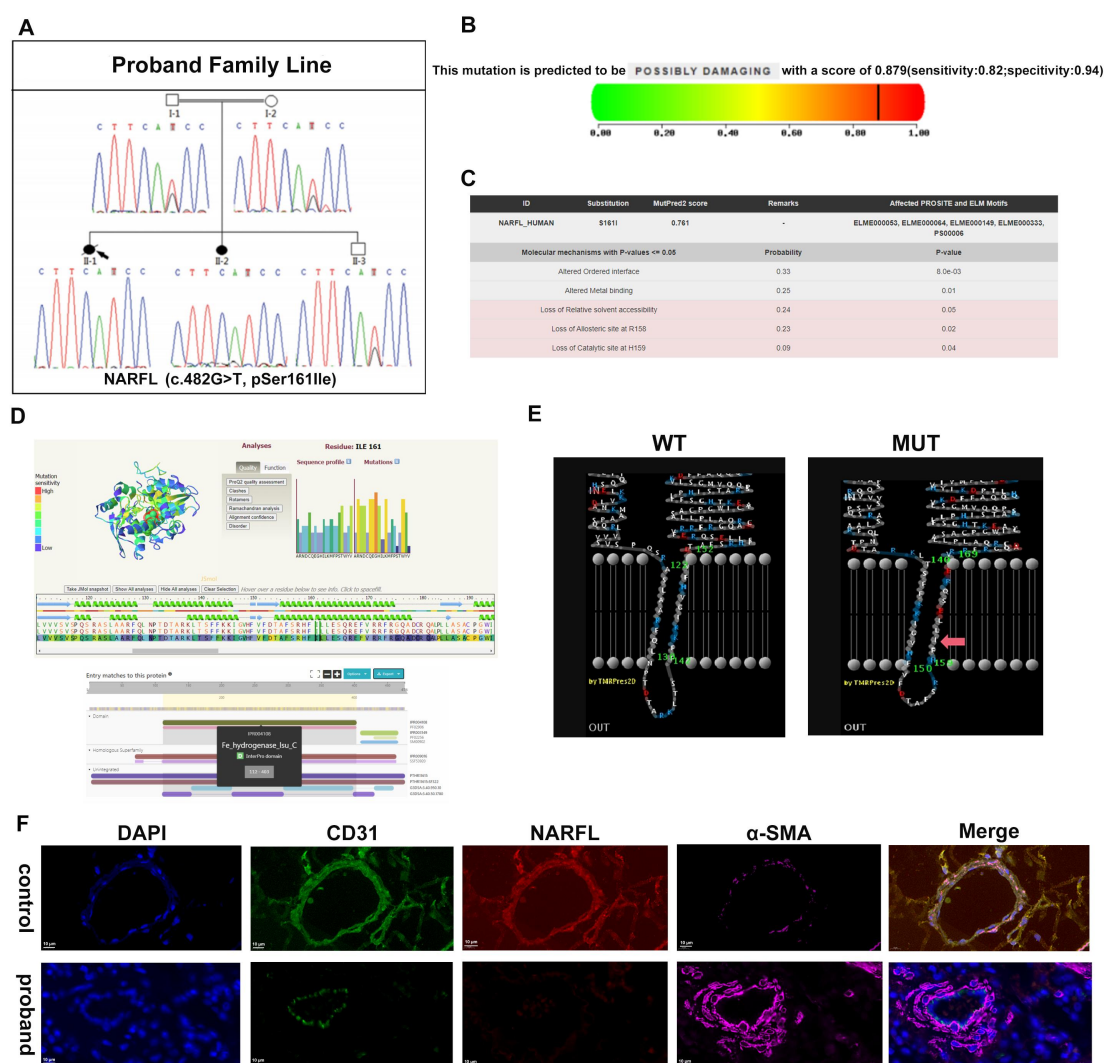

434

435 **Supplemental Figure 1.** Family with Pulmonary Hypertension Secondary to Diffuse Pulmonary  
436 Arteriovenous Malformation. (A) Sequencing results from the family members with pulmonary  
437 hypertension secondary to diffuse pulmonary arteriovenous malformation show a homozygous  
438 mutation in exon 5 of the NARFL gene. The mutation involves a change from AGC to ATC  
439 (hg19NM\_002493 c.482 G>T) resulting in an amino acid substitution from serine (Ser, S) to  
440 isoleucine (Ile, I). (B) The pathogenicity of the mutation was predicted using Polyphen 2 software,  
441 which indicates that it is a deleterious mutation. (C) The VarSome software predicts the effects of  
442 the mutation site, suggesting that it may alter the metal-binding domain. (D) The Phyre2 software  
443 was used to predict the functional implications of the mutation region (c.482 G>T), indicating that  
444 the T mutation is located in the functional region of the ferric hydrogenase. (E) The PRED-TMBB  
445 software predicted a change in the mutation region from a non-transmembrane region to an

446 intra-transmembrane region. (F) Immunohistochemical staining of lung tissue from the affected  
447 family members with pulmonary hypertension secondary to diffuse pulmonary arteriovenous  
448 malformation. The staining shows the presence of CD31 (green) expressed in endothelial cells,  
449  $\alpha$ -SMA (pink) expressed in myofibroblasts, and NARFL (red) expressed in the tissue cytoplasm.  
450 Merge images show the combination of all staining results with a field of view magnification of  
451 100 $\times$ .

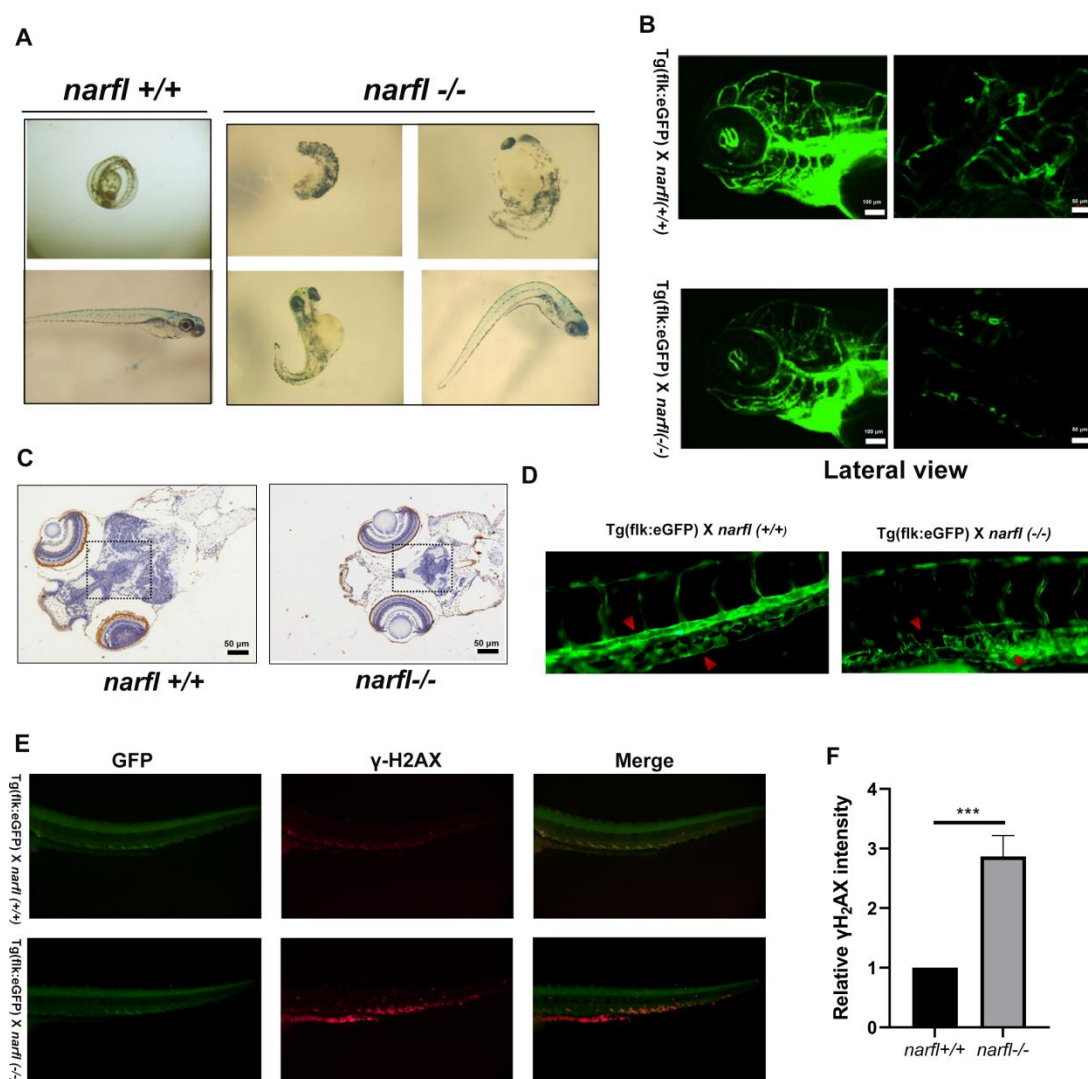

452  
453 **Supplemental Figure 2.** Deletion of the *narfl* gene Causes Abnormal Development and Vascular  
454 Structure in Zebrafish. (A) Morphological deformities during development were observed in  
455 *narfl*<sup>-/-</sup> zebrafish. (B) Fluorescence inverted microscope imaging system was used to observe the  
456 blood vessels in the lateral field of the zebrafish brain with different genotypes. (C) TUNEL  
457 staining of paraffin sections of the zebrafish brain at 9 dpf with different genotypes showed DNA  
458 damage. The field of view was observed at 100 $\times$  magnification. (D) Fluorescence confocal  
459 microscope observation and quantitative analysis of zebrafish vascular segments showed obvious

460 disorganization in the structure of the dorsal aorta and posterior main vein in *narfl*<sup>-/-</sup> zebrafish.  
 461 (E-F) The  $\gamma$ H2AX test revealed significant DNA damage in the dorsal aorta and portions of the  
 462 posterior main vein. Statistical analysis of the results showed significant differences compared to  
 463 the control groups: \* $p < 0.05$ , \*\*\* $p < 0.001$ .

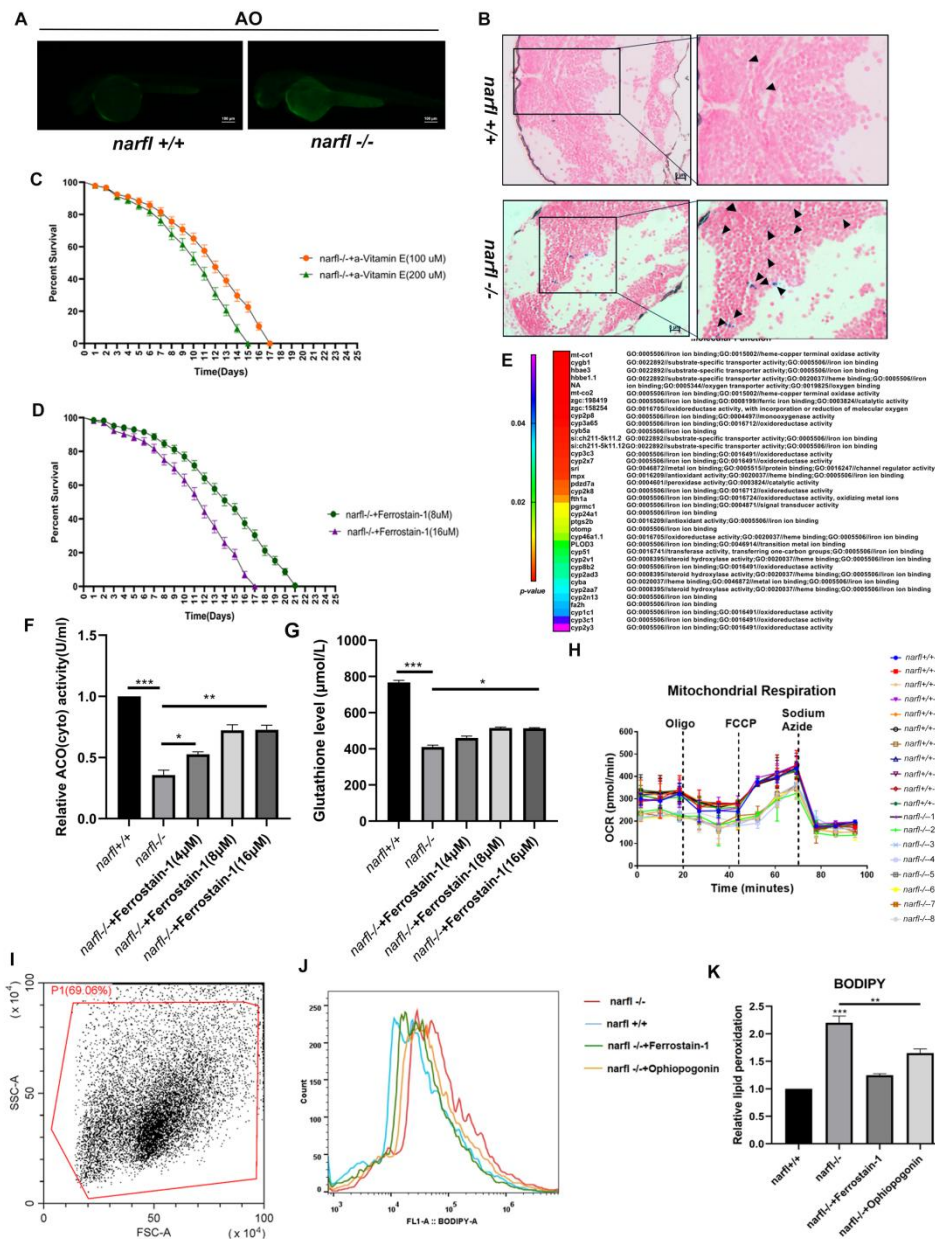

464  
 465 **Supplemental Figure 3.** *narfl* Gene Deletion Induces Oxidative Stress, Lipid Peroxidation, and  
 466 Iron Level Increase in Zebrafish. (A) Apoptosis level in 5-day-old zebrafish was assessed by AO  
 467 staining. Green fluorescence intensity reflects the apoptosis level, and the visual field  
 468 magnification was set as 200 $\times$ . (B) Hemosiderin content in the brain of 7-day-old zebrafish was  
 469 determined by Prussian blue staining. The blue region indicated by the black arrow represents the  
 470 positive part, with visual field magnifications set at 200 $\times$  and 400 $\times$  respectively. (C) Zebrafish  
 471 embryos were treated with  $\alpha$ -Vitamin E at concentrations of 100  $\mu$ M and 200  $\mu$ M. The survival



472 time of *narfl*<sup>-/-</sup> zebrafish was extended to 15 dpf with 200  $\mu$ M  $\alpha$ -Vitamin E, and to 17 dpf with  
 473 100  $\mu$ M  $\alpha$ -Vitamin E. (D) Zebrafish embryos were treated with Ferrostain-1 at concentrations of 8  
 474  $\mu$ M and 16  $\mu$ M. The survival time of *narfl*<sup>-/-</sup> zebrafish was extended to 17 dpf after 16  $\mu$ M  
 475 Ferrostain-1 treatment, and to 21 dpf after 8  $\mu$ M Ferrostain-1 treatment. (E) List of iron  
 476 metabolism-related genes differentially expressed in transcriptome sequencing between wild and  
 477 *narfl*<sup>-/-</sup> zebrafish. (F) Cytoplasmic cis-aconitase activity was measured in zebrafish at 5 dpf after  
 478 treatment with Ferrostain-1 at concentrations of 4  $\mu$ M, 8  $\mu$ M, and 16  $\mu$ M. (G) Glutathione levels in  
 479 zebrafish were assessed at 5 dpf after treatment with Ferrostain-1 at concentrations of 4  $\mu$ M, 8  $\mu$ M,  
 480 and 16  $\mu$ M. (H) Mitochondrial respiration was evaluated in 11 wild-type and 8 *narfl*<sup>-/-</sup> zebrafish.  
 481 (I-K) BODIPY levels in wild-type and *narfl*<sup>-/-</sup> zebrafish treated with Ferrostain-1 and  
 482 Ophiopogonin were measured by flow cytometry. \* $p$ <0.05, \*\* $p$ <0.01, \*\*\* $p$ <0.001.

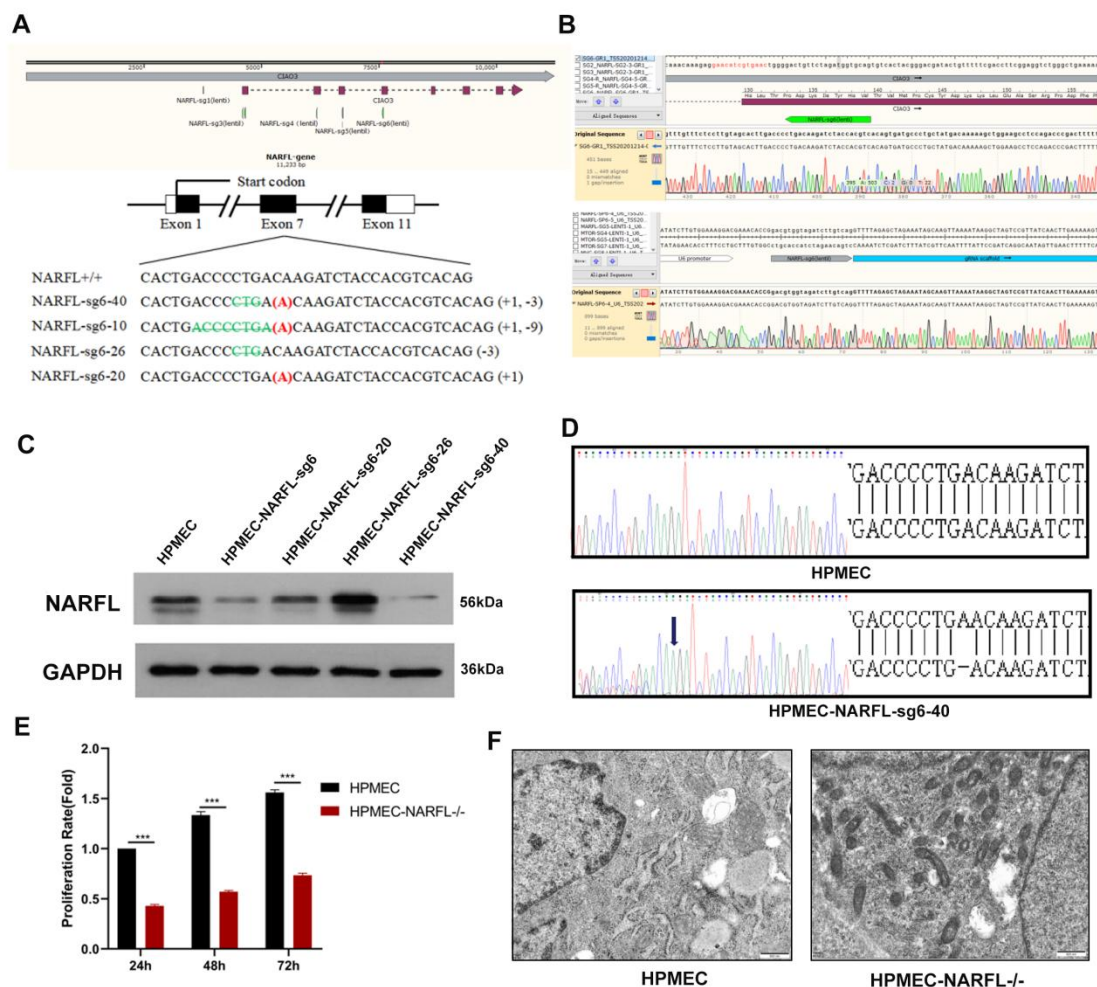

483  
 484 **Supplemental Figure 4.** Construction of NARFL Gene Knockout Stable Cell Line in HPMEC  
 485 Cells. (A) Design location of sgRNA. (B) Plasmid sequencing results. (C) Western blot analysis of  
 486 monoclonal protein. Compared to wild-type cells, NARFL expression was significantly  
 487 down-regulated in HPMEC-NARFL-sg6. NARFL expression in HPMEC-NARFL-sg6-20 was

488 comparable to wild-type cells. NARFL expression was higher in HPMEC-NARFL-sg6-26  
 489 compared to wild-type cells. NARFL expression was significantly down-regulated in  
 490 HPMEC-NARFL-sg6-40. (D) DNA sequences of HPMEC and HPMEC-NARFL-sg6-40. (E) Cell  
 491 proliferation capacity was quantitatively determined using the CCK-8 method at 24h-72h.  
 492 \*\*\* $p < 0.001$ . (F) Abnormal morphology of endothelial mitochondria due to NARFL gene deletion  
 493 observed by electron microscope.

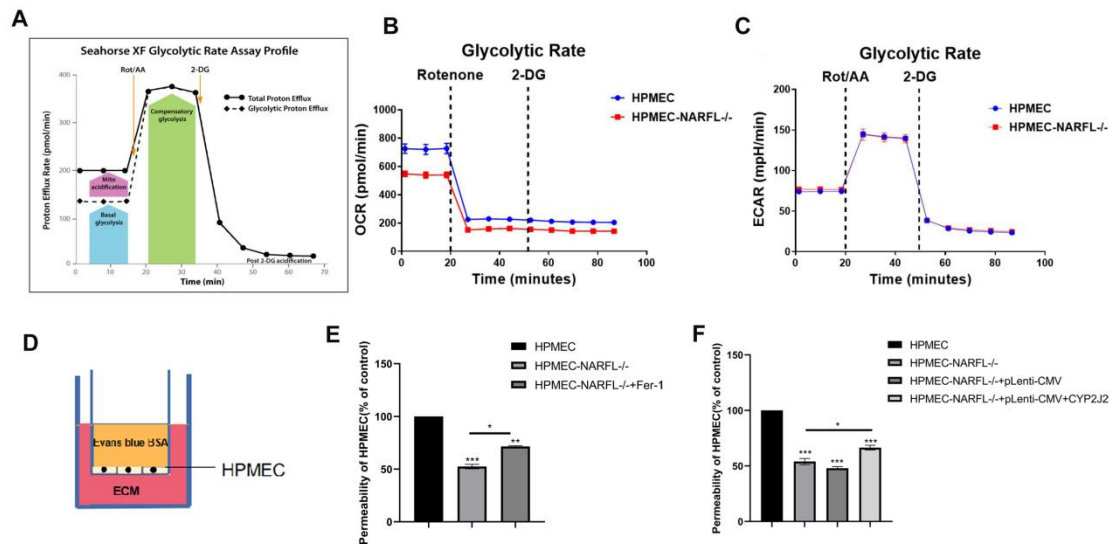

494  
 495 **Supplemental Figure 5.** Effect of NARFL Gene Deletion on Endothelial Cell Glycolysis and  
 496 Endothelial Dysfunction. (A) Model diagram illustrating the calculation of key parameters of  
 497 glycolysis in the cell glycolysis rate curve. The basic proton flow rate represents the number of  
 498 protons released by cells into the detection solution before the addition of rotenone or antimycin A.  
 499 The mitochondrial acidification rate is the product of the mitochondrial oxygen consumption rate  
 500 and carbon dioxide contribution coefficient. Basal glycolysis is the difference between the basal  
 501 proton flow rate and mitochondrial acidification rate. Compensatory glycolysis refers to the  
 502 highest proton outflow rate after the addition of rotenone or antimycin A. Acidification after the  
 503 addition of 2-DG refers to the lowest value of proton flow rate after the addition of 2-DG. (B)  
 504 Glycolysis rate curves of HPMEC and NARFL mutated HPMEC cells. Blue represents wild-type  
 505 HPMEC, and red represents NARFL mutated HPMEC. (C) Results of extracellular acidification  
 506 showed no significant difference. (D) Diagram of the Evans Blue cell penetration experiment.  
 507 Cells were inoculated in the Transwell chamber, and ECM medium was placed in the lower  
 508 chamber. (E-F) Quantitative results of the Evans Blue cell penetration experiment.

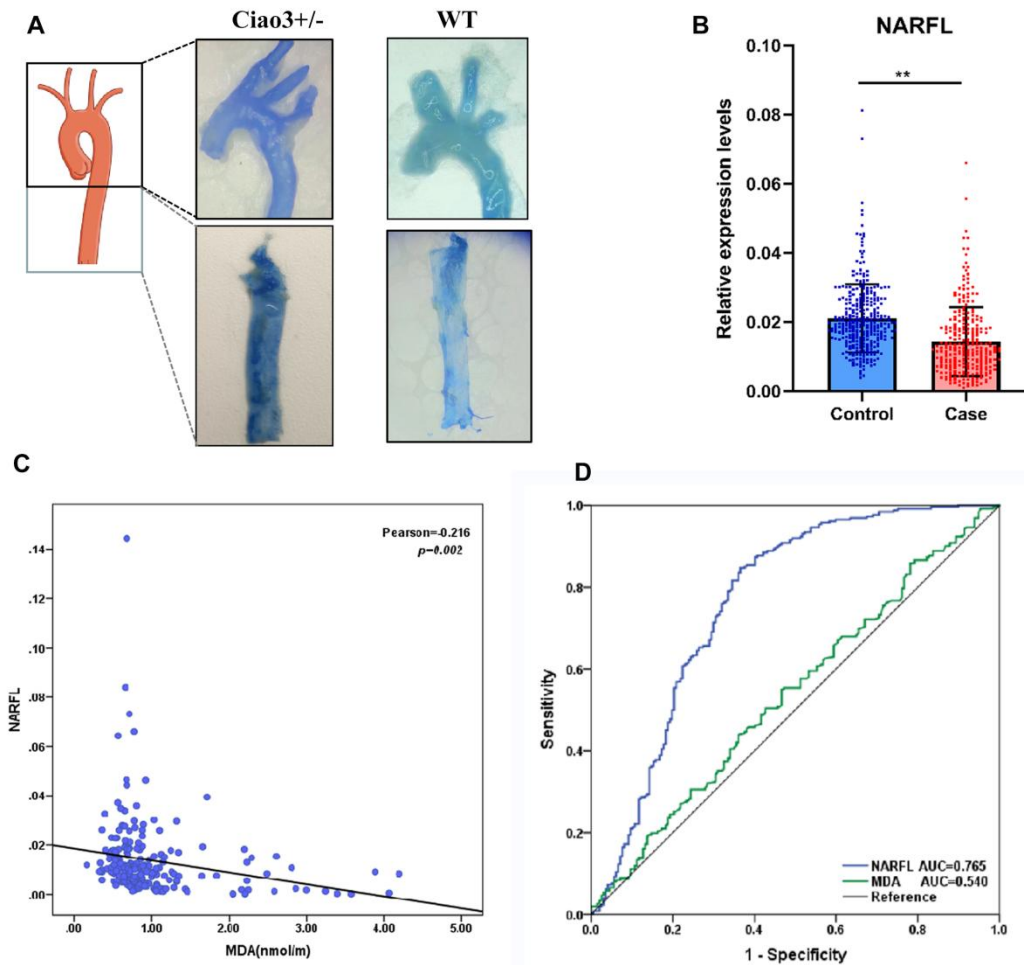

509

510 **Supplemental Figure 6.** Impairment of Vascular Function in Ciao3 Heterozygous Mice and  
511 NARFL Polymorphisms as Susceptible Sites for Vascular Endothelial Dysfunction Diseases. (A)  
512 Evans Blue staining results of the aortic arch in Ciao3<sup>+/-</sup> mice showed significantly darker  
513 staining compared to the wild-type group, indicating vascular dysfunction. (B) NARFL expression  
514 levels were significantly lower in the disease group,  $**p<0.01$ . (C) The expression of NARFL was  
515 negatively correlated with MDA levels. (D) Receiver Operator Characteristic (ROC) curve was  
516 generated to compare the diagnostic ability of the MDA levels and NARFL expression levels in  
517 the disease population with tagSNP difference. The results demonstrated that NARFL expression  
518 levels provided better discrimination of the population with tagSNP difference. The area under the  
519 curve (AUC) for NARFL was 0.765, while the AUC for MDA was 0.540, indicating a lower  
520 discriminative ability compared to NARFL.

521

## 522 **Supplemental References**

523 1. Dai X, Pradhan A, Liu J, Liu R, Zhai G, Zhou L, Dai J, Shao F, Yuan Z, Wang Z and Yin Z.  
524 Zebrafish gonad mutant models reveal neuroendocrine mechanisms of brain sexual dimorphism  
525 and male mating behaviors of different brain regions. *Biology of sex differences*. 2023;14:53.

- 526 2. Kimmel C, Ballard W, Kimmel S, Ullmann B and Schilling T. Stages of embryonic  
527 development of the zebrafish. *Developmental dynamics : an official publication of the American*  
528 *Association of Anatomists*. 1995;203:253-310.
- 529 3. Siekmann AF and Lawson ND. Notch signalling limits angiogenic cell behaviour in  
530 developing zebrafish arteries. *Nature*. 2007;445:781-4.
- 531 4. Moens C. Whole mount RNA in situ hybridization on zebrafish embryos: hybridization. *CSH*  
532 *protocols*. 2008;2008:pdb.prot5037.
- 533 5. Moens C. Whole mount RNA in situ hybridization on zebrafish embryos: mounting. *CSH*  
534 *protocols*. 2008;2008:pdb.prot5038.
- 535 6. Moens C. Whole mount RNA in situ hybridization on zebrafish embryos: probe synthesis.  
536 *CSH protocols*. 2008;2008:pdb.prot5036.
- 537 7. Luo J, Zhang X, He S, Lou Q, Zhai G, Shi C, Yin Z and Zheng F. Deletion of narfl leads to  
538 increased oxidative stress mediated abnormal angiogenesis and digestive organ defects in  
539 zebrafish. *Redox Biol*. 2020;28:101355.
- 540 8. Meeker N, Hutchinson S, Ho L and Trede N. Method for isolation of PCR-ready genomic  
541 DNA from zebrafish tissues. *BioTechniques*. 2007;43:610, 612, 614.
- 542 9. Bertero T, Oldham W, Cottrill K, Pisano S, Vanderpool R, Yu Q, Zhao J, Tai Y, Tang Y, Zhang  
543 Y, Rehman S, Sugahara M, Qi Z, Gorcsan J, Vargas S, Sagggar R, Sagggar R, Wallace W, Ross D,  
544 Haley K, Waxman A, Parikh V, De Marco T, Hsue P, Morris A, Simon M, Norris K, Gaggioli C,  
545 Loscalzo J, Fessel J and Chan S. Vascular stiffness mechanoactivates YAP/TAZ-dependent  
546 glutaminolysis to drive pulmonary hypertension. *The Journal of clinical investigation*.  
547 2016;126:3313-35.
- 548 10. Yu Q, Tai YY, Tang Y, Zhao J, Negi V, Culley MK, Pilli J, Sun W, Brugger K, Mayr J, Sagggar  
549 R, Sagggar R, Wallace WD, Ross DJ, Waxman AB, Wendell SG, Mullett SJ, Sembrat J, Rojas M,  
550 Khan OF, Dahlman JE, Sugahara M, Kagiya N, Satoh T, Zhang M, Feng N, Gorcsan J, 3rd,  
551 Vargas SO, Haley KJ, Kumar R, Graham BB, Langer R, Anderson DG, Wang B, Shiva S, Bertero  
552 T and Chan SY. BOLA (Bola Family Member 3) Deficiency Controls Endothelial Metabolism  
553 and Glycine Homeostasis in Pulmonary Hypertension. *Circulation*. 2019;139:2238-2255.

554

555
